# Supplementary material
Source: bioRxiv or medRxiv preprint supplement (https://medrxiv.org/highwire/filestream/92304/field_highwire_adjunct_files/0/2020.08.05.20168971-1.pdf)
Supplement: Supplementary file [file 2020.08.05.20168971-1.pdf]

## Supplementary Materials

| <b>Supplementary Figures</b> |                                                                                                          |
|------------------------------|----------------------------------------------------------------------------------------------------------|
| Supplementary Figure 1       | Serum IgG isotype and subclass responses across CoV and control antigen types.                           |
| Supplementary Figure 2       | Serum IgA, D, and M isotype and subclass responses across CoV and control antigen types.                 |
| Supplementary Figure 3       | Serum Fc $\gamma$ R binding responses across antibodies specific to CoV and control antigen types.       |
| Supplementary Figure 4       | Nasal IgG isotype and subclass responses across CoV and control antigen types.                           |
| Supplementary Figure 5       | Nasal IgA, D, and M isotype and subclass responses across CoV and control antigen types.                 |
| Supplementary Figure 6       | Nasal Fc $\gamma$ R binding responses across antibodies specific to CoV and control antigen types.       |
| Supplementary Figure 7       | Stool IgA and IgG responses across CoV and control antigen types                                         |
| Supplementary Figure 8       | Differences in Ab responses observed between naïve and convalescent donors                               |
| Supplementary Figure 9       | Complete serum Ab Fc Array profiles                                                                      |
| Supplementary Figure 10      | Complete nasal wash Ab Fc Array profiles                                                                 |
| Supplementary Figure 11      | Differences in Ab responses among convalescent donors by subject characteristics                         |
| Supplementary Figure 12      | Heatmap of serum Ab features that differ between donors who experienced severe versus non-severe disease |
| <b>Supplementary Tables</b>  |                                                                                                          |
| Supplementary Table 1        | Fc Array Reagents                                                                                        |
| Supplementary Table 2        | CoV Antigen Sequences                                                                                    |
| Supplementary Table 3        | Sample Dilutions in the Fc Array Assay                                                                   |

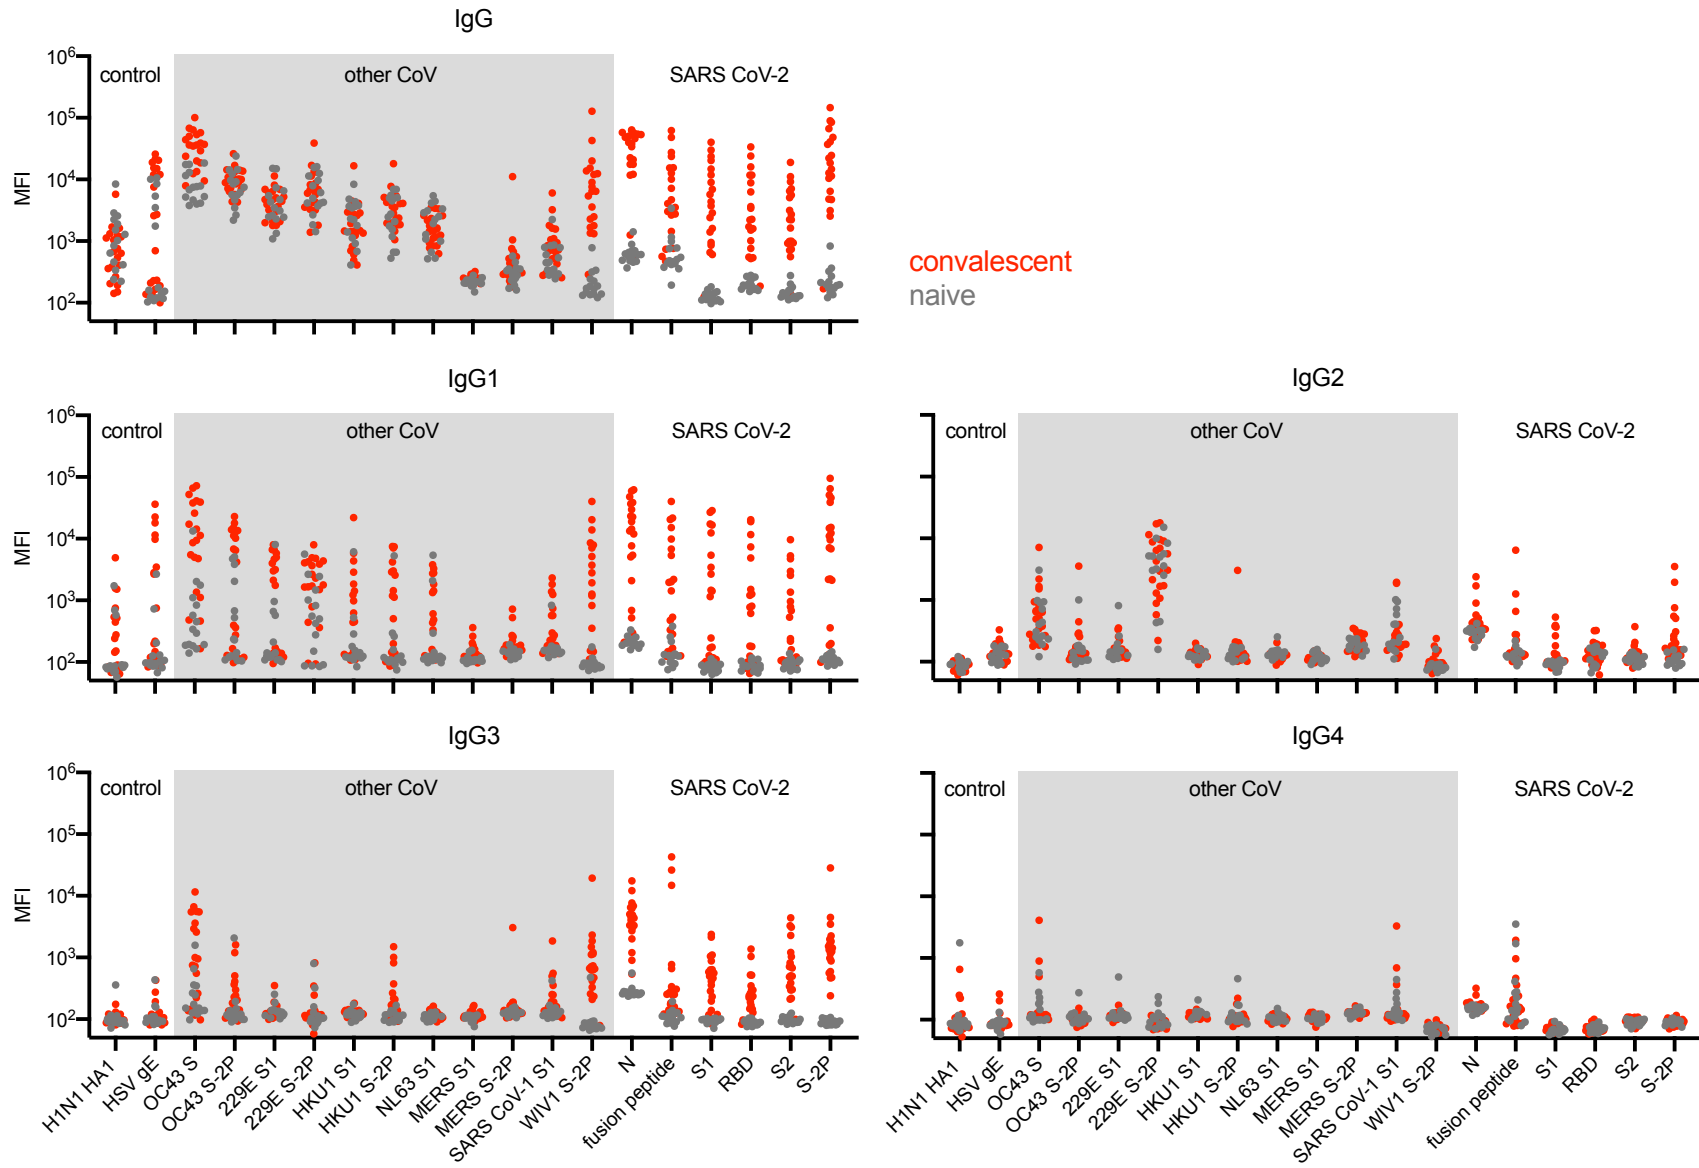

**Supplementary Figure 1.** Serum IgG isotype and subclass responses across CoV and control antigen types.

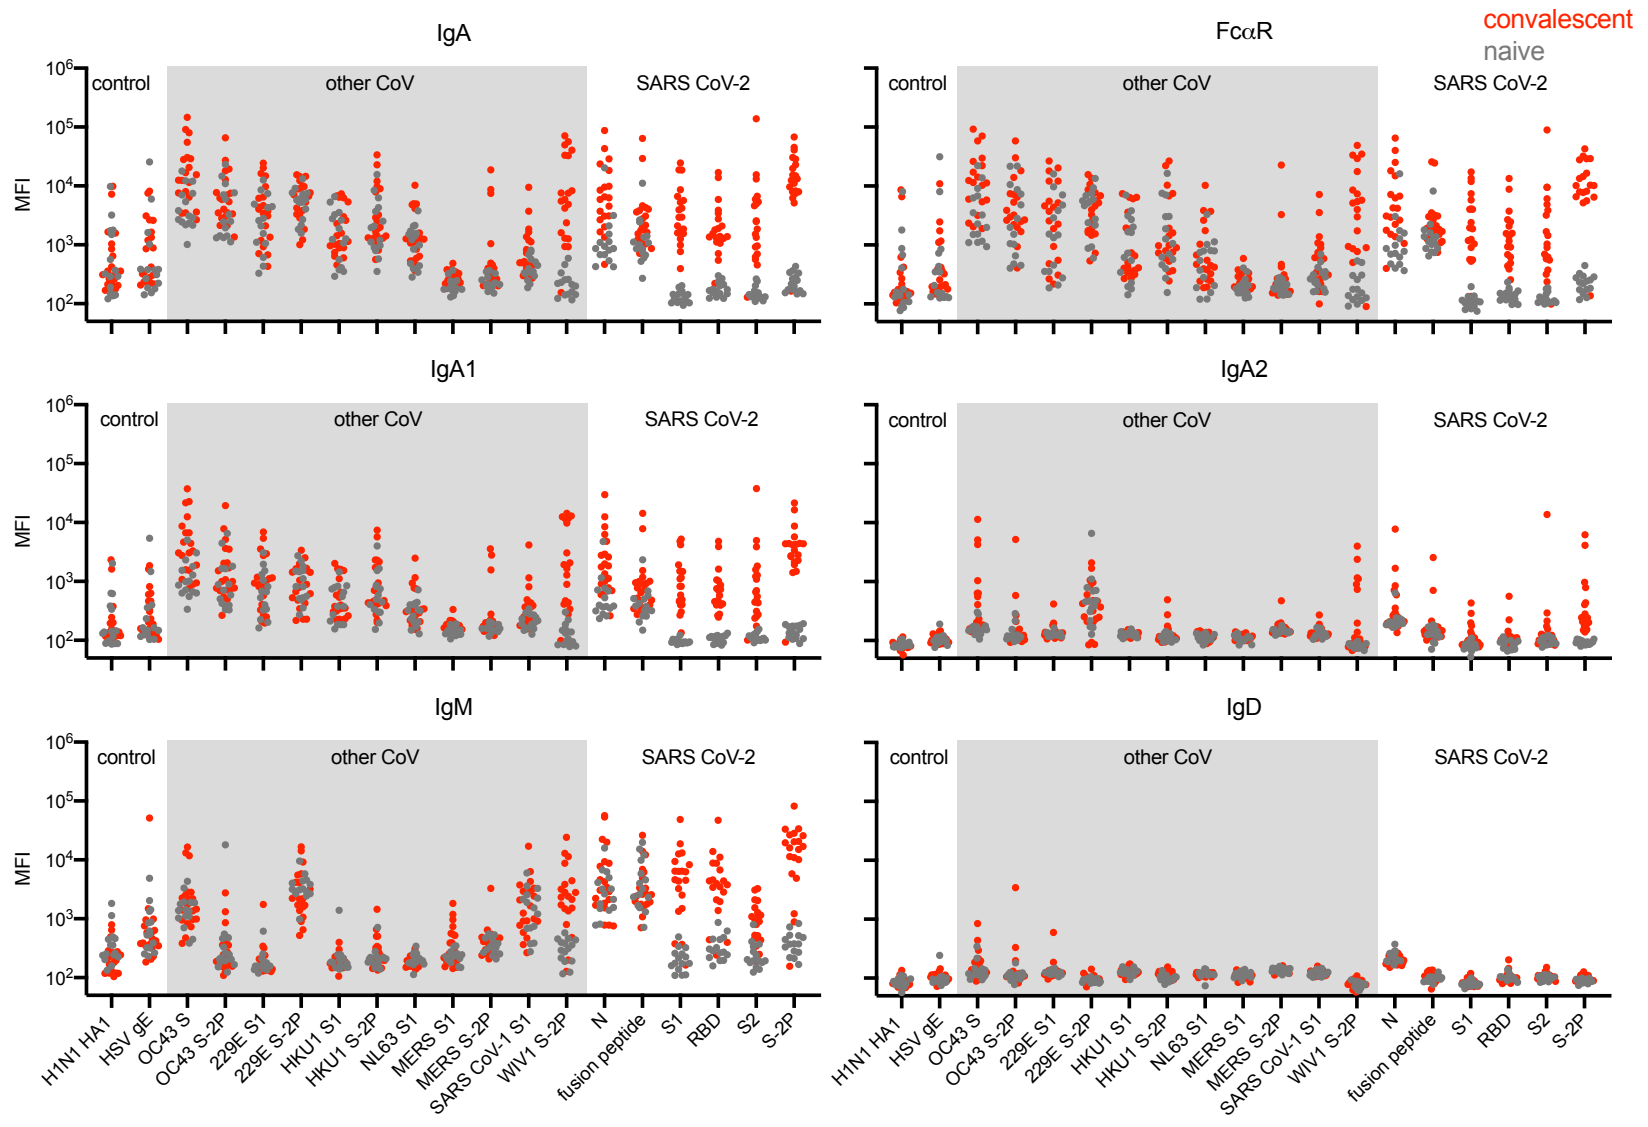

**Supplementary Figure 2.** Serum IgA, D, and M isotype and subclass responses across CoV and control antigen types.

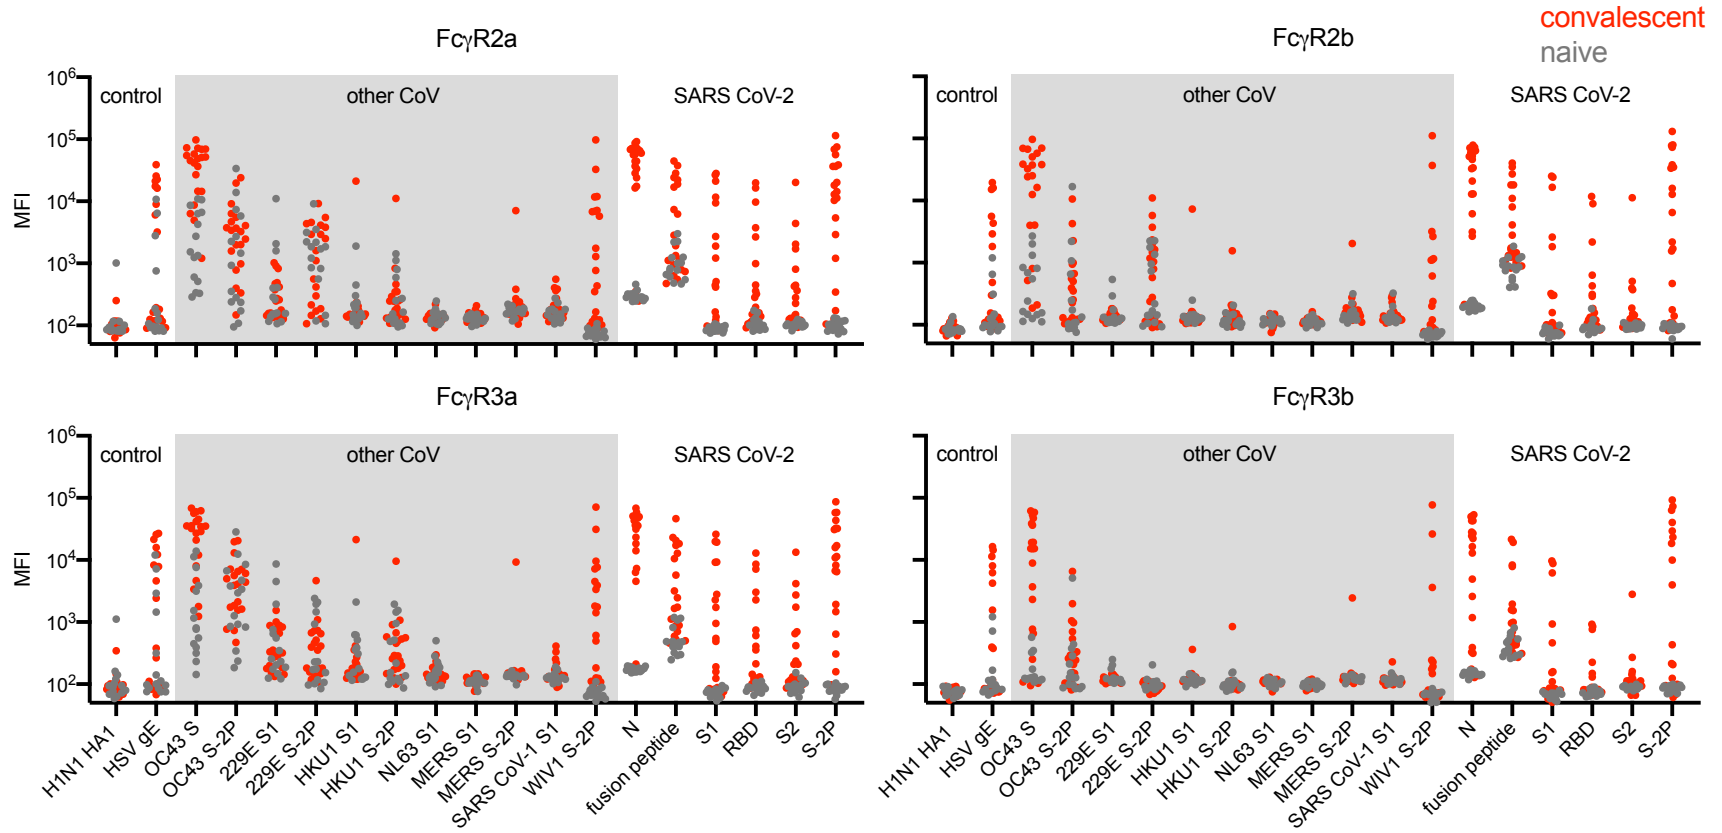

**Supplementary Figure 3.** Serum Fc $\gamma$ R binding responses across antibodies specific to CoV and control antigen types.



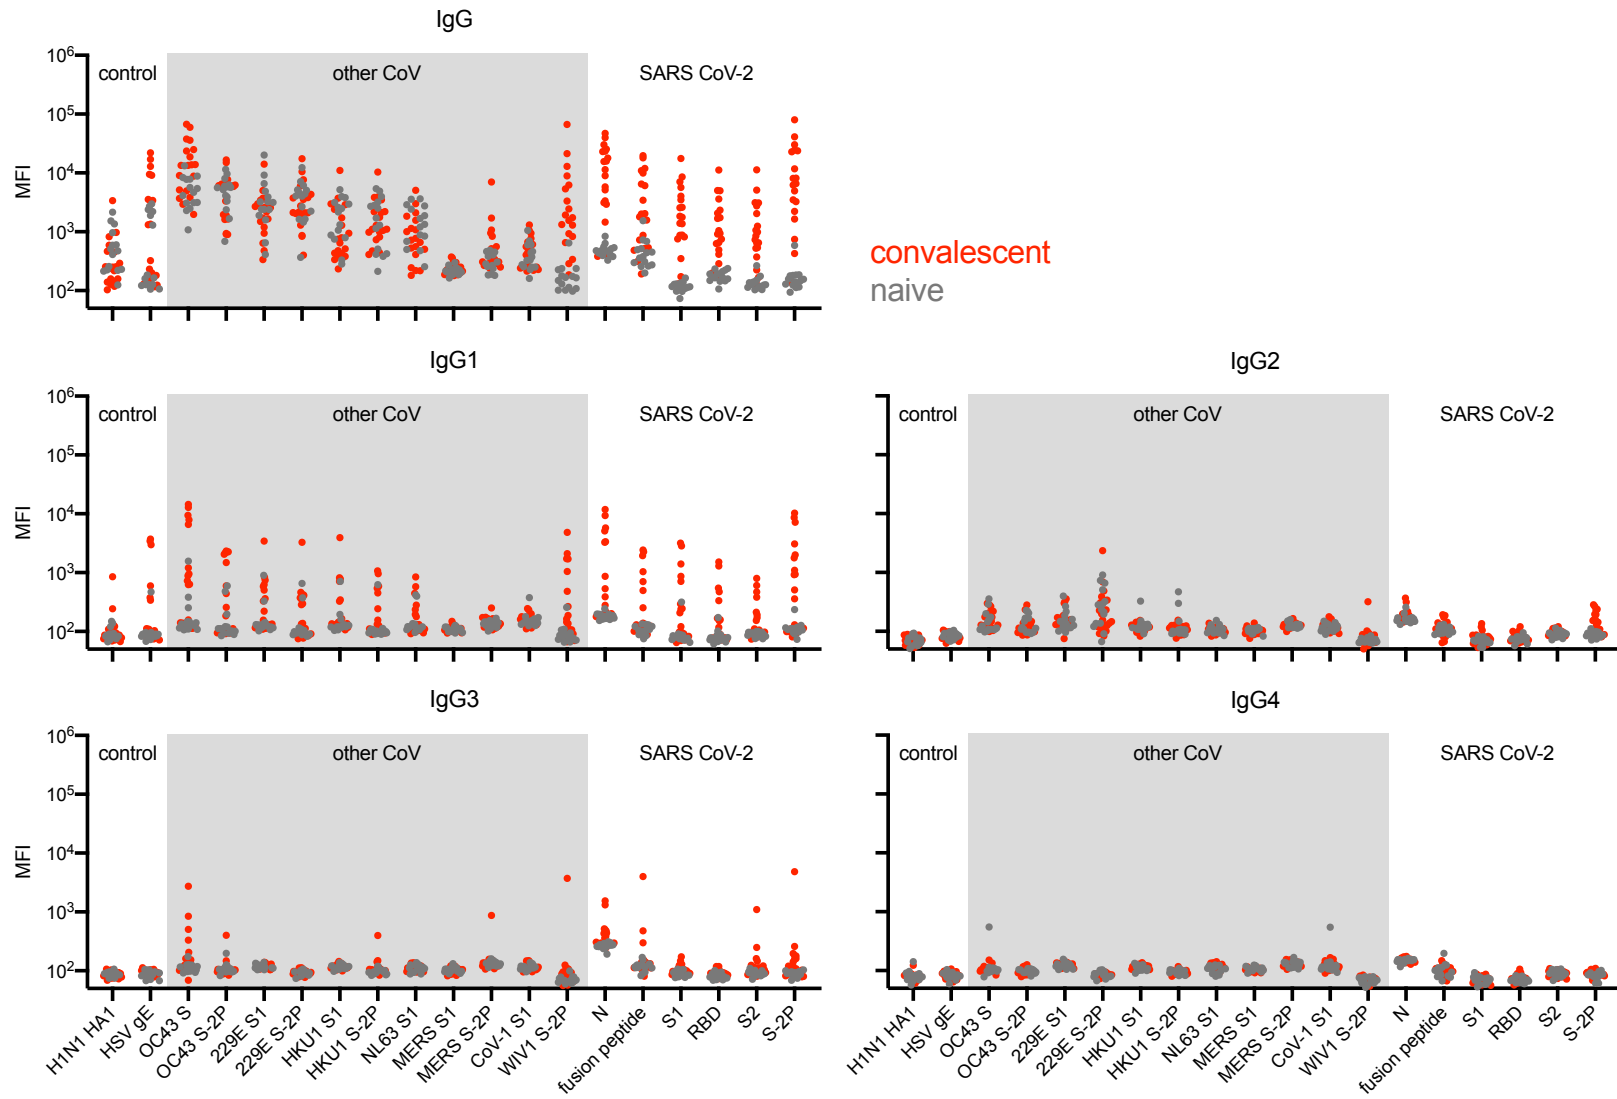

**Supplementary Figure 4.** Nasal IgG isotype and subclass responses across CoV and control antigen types.

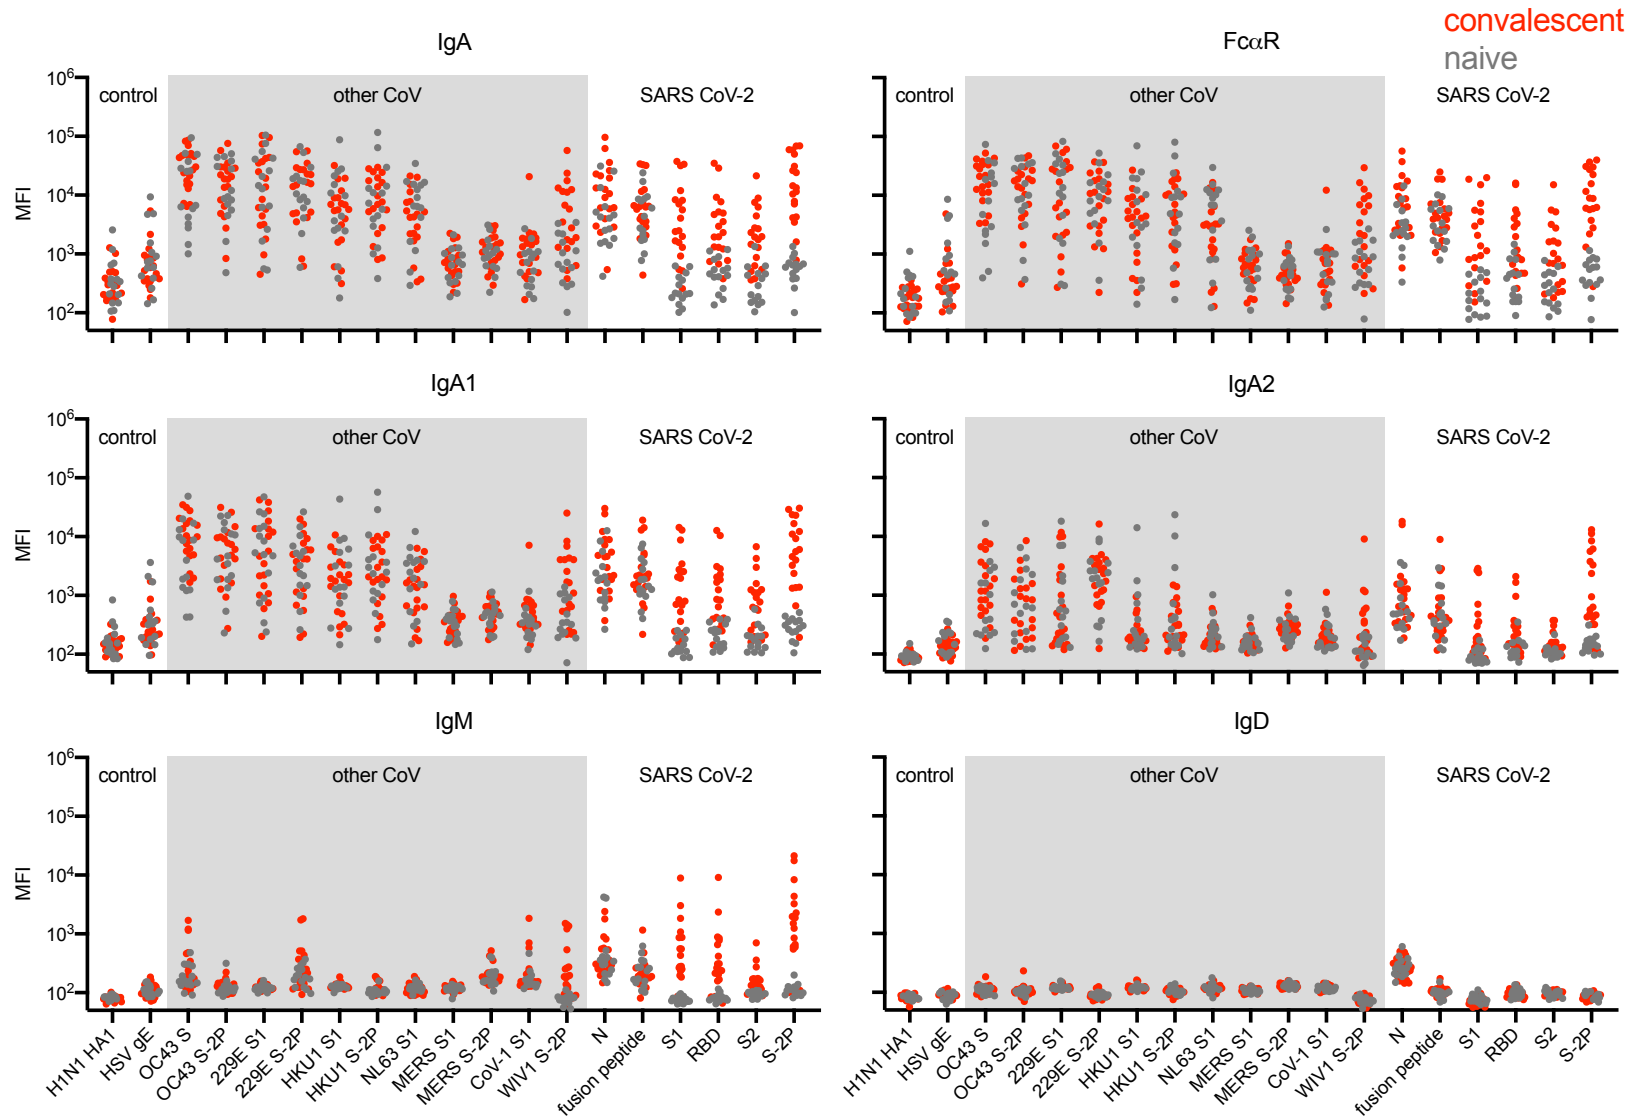

**Supplementary Figure 5.** Nasal IgA, D, and M isotype and subclass responses across CoV and control antigen types.

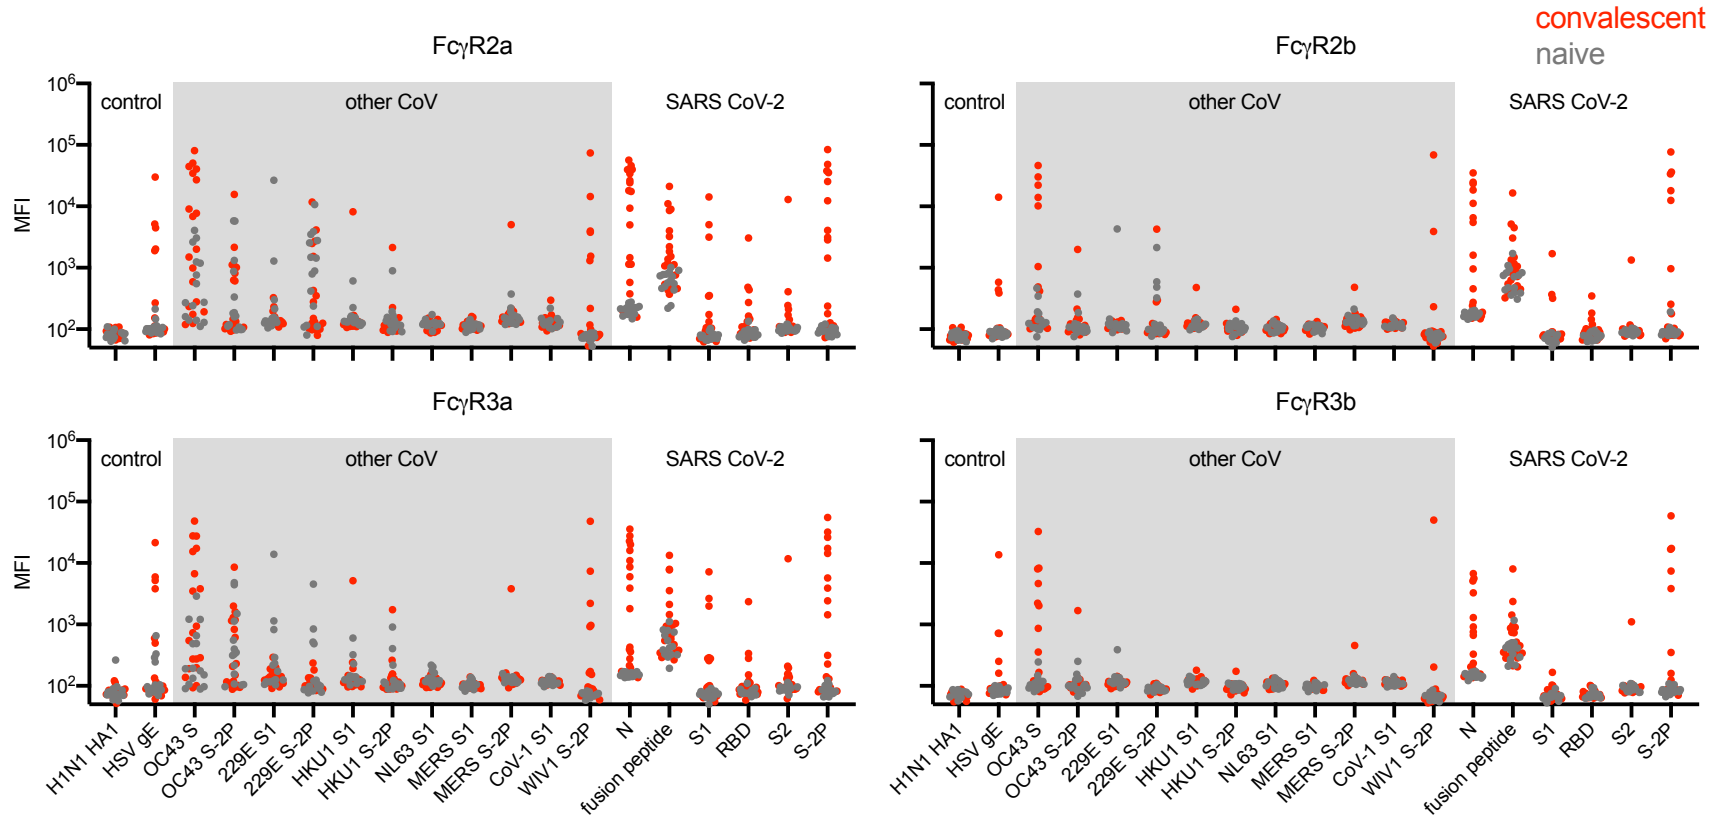

**Supplementary Figure 6.** Nasal FcγR binding responses across antibodies specific to CoV and control antigen types.

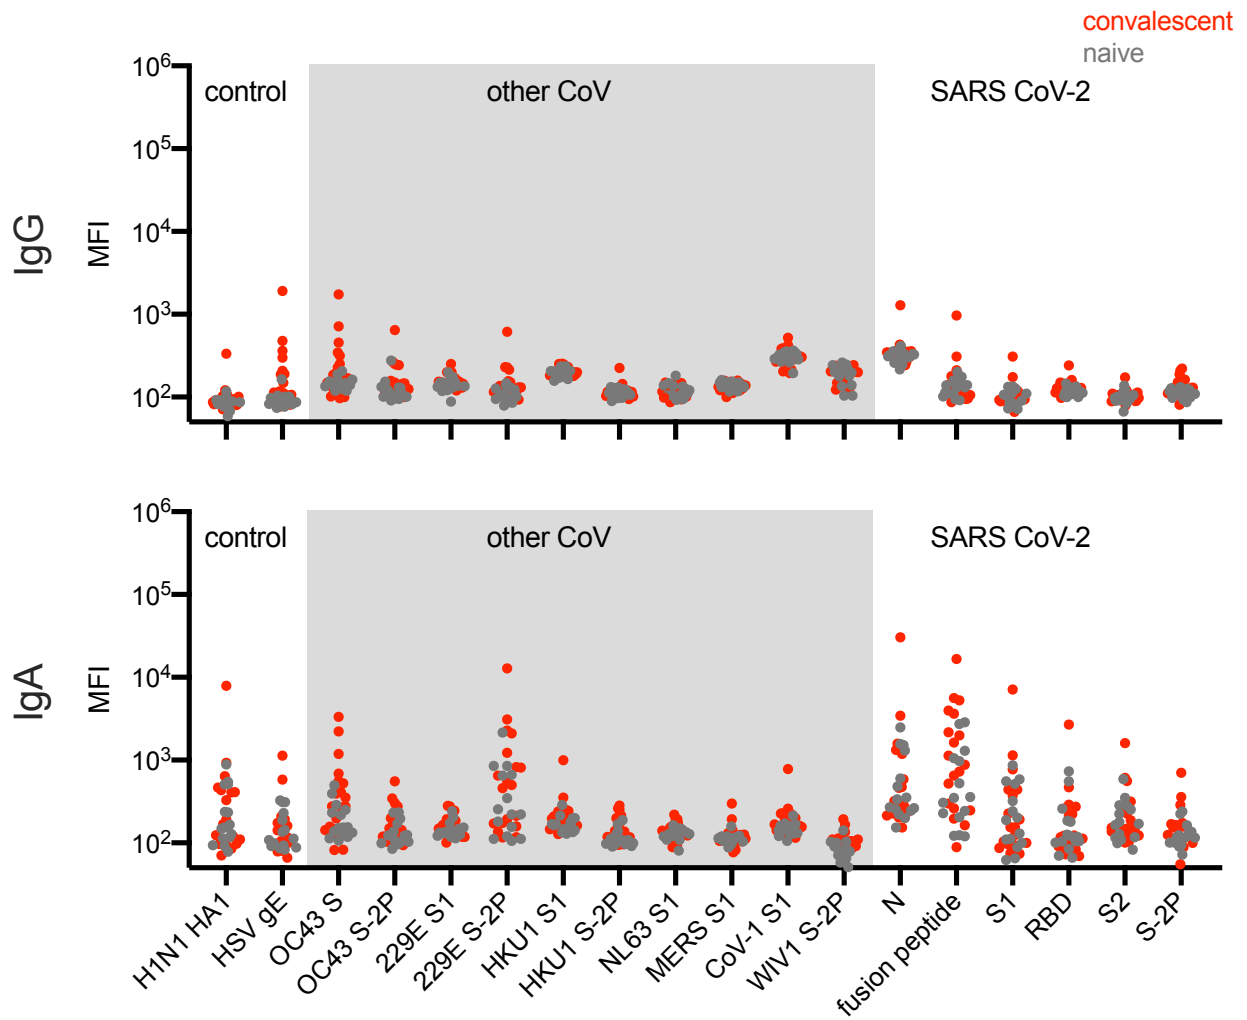

**Supplementary Figure 7.** Stool IgG and IgA responses across CoV and control antigen types.

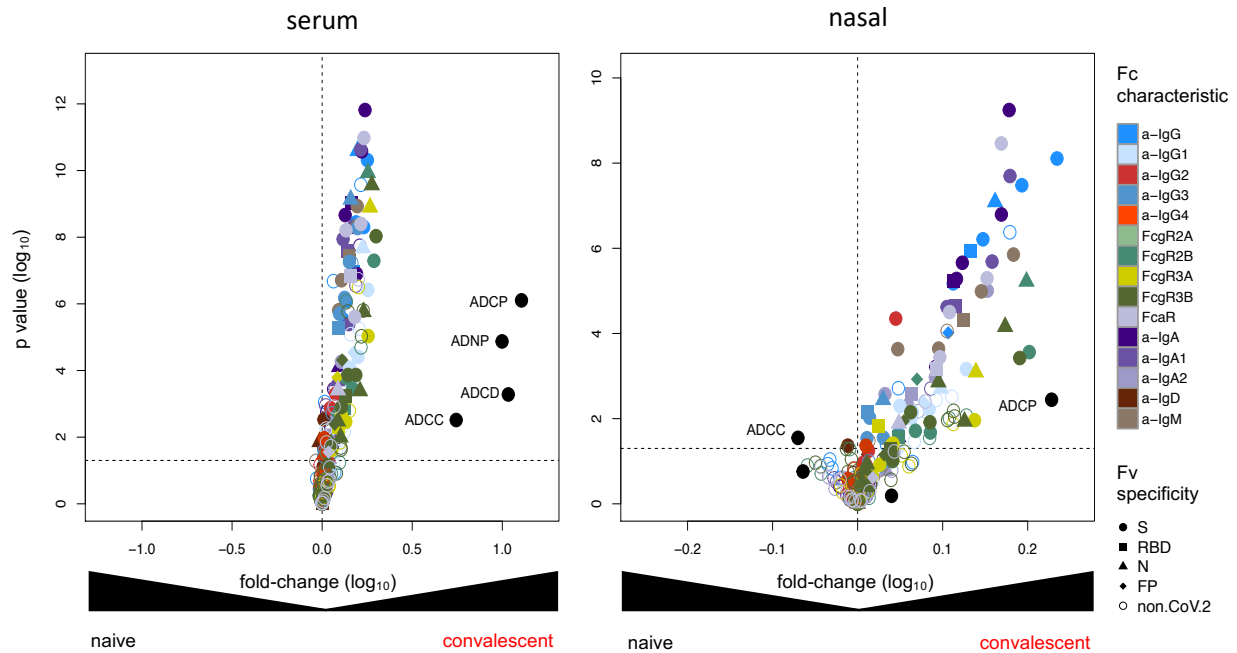

**Supplementary Figure 8. Differences in Ab responses observed between naïve and convalescent donors.** Volcano plots depicting fold-change and unadjusted statistical significance (unpaired two-tailed t test with Welch’s correction) of biophysical and functional response features in serum (left) and nasal wash (right) samples by infection status. Functional assay data is labeled by name and log-transformed Fc array data is depicted with antigen specificity indicated by shape and Fc characteristic indicated by color. Dotted horizontal line indicates  $p = 0.05$ .

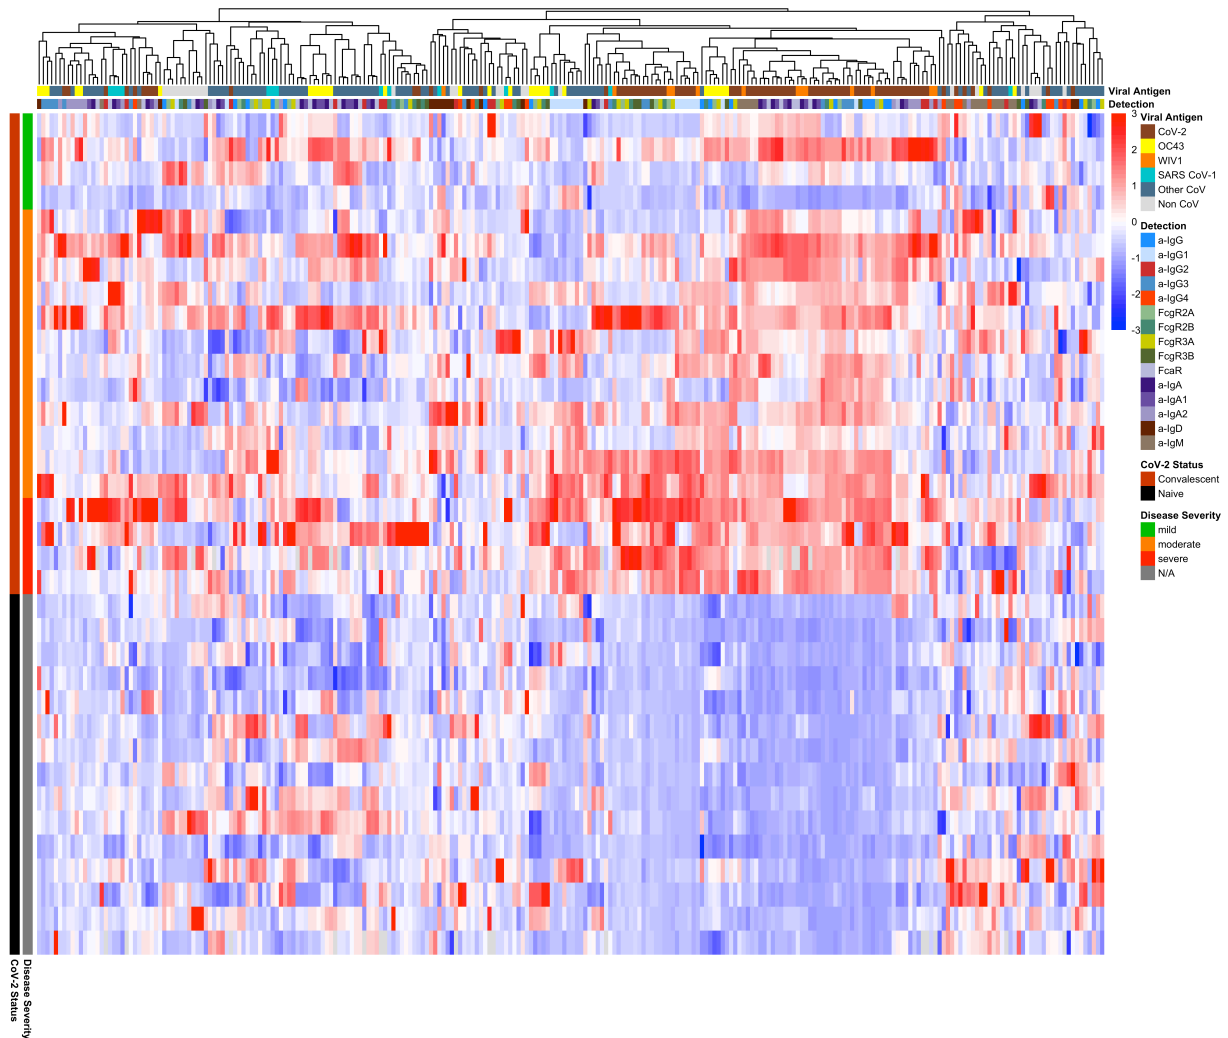

**Supplementary Figure 9. Complete Serum Ab Fc Array Profiles.** Heatmap of Fc array features in serum samples. Features are hierarchically-clustered with Fv specificity (viral antigen) and Fc characteristic (detection) indicated in x-axis color bar. Subjects are stratified by infection or disease severity status. Responses are centered and scaled per feature and the scale range truncated at  $\pm 3$  SD.

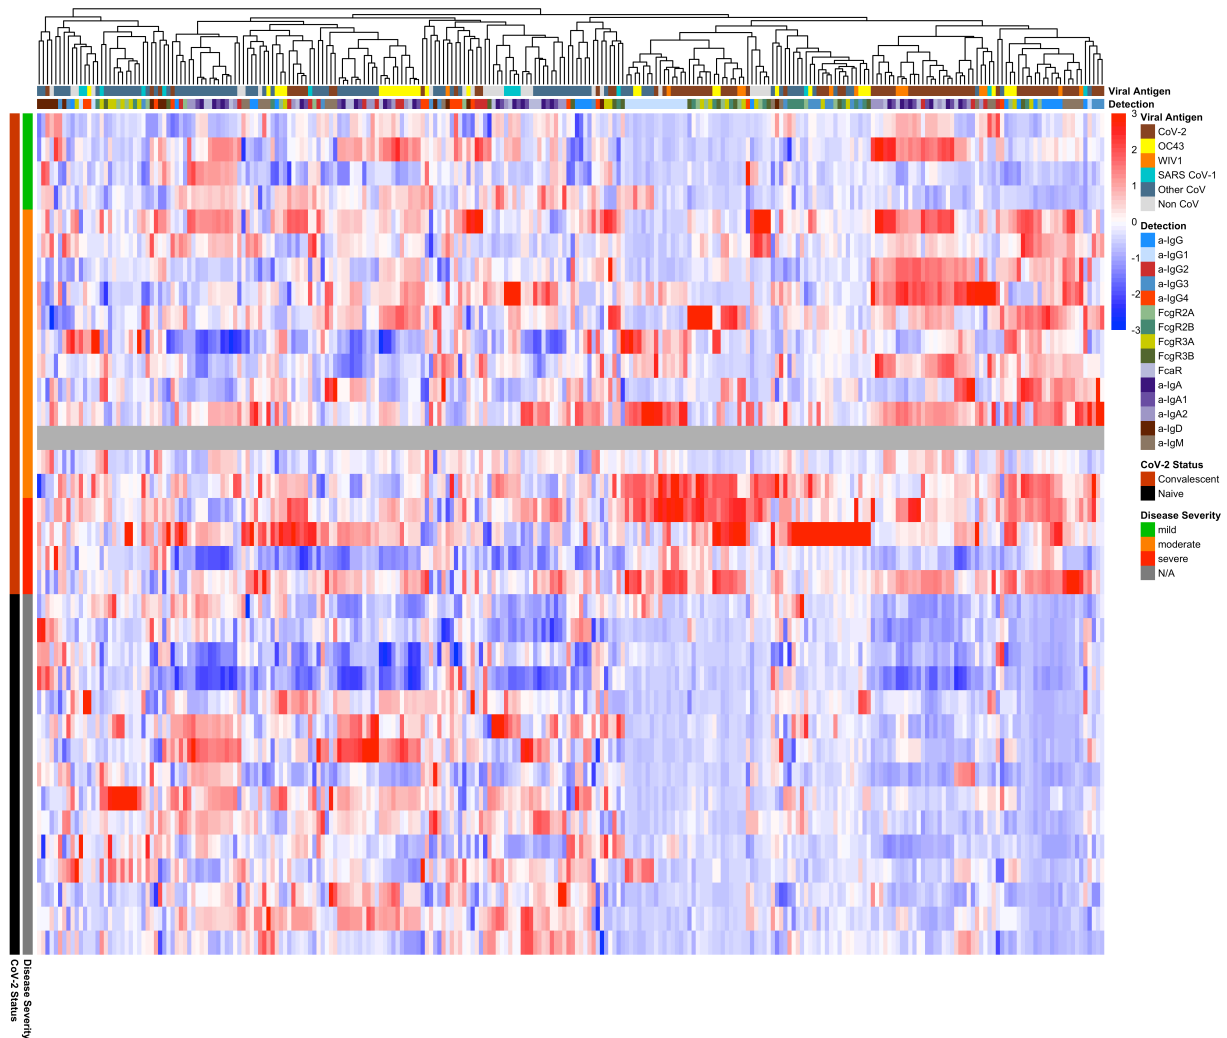

**Supplementary Figure 10. Complete Nasal Ab Fc Array Profiles.** Heatmap of Fc array features in nasal wash samples. Features are hierarchically-clustered with Fv specificity (viral antigen) and Fc characteristic (detection) indicated in x-axis color bar. Subjects are stratified by infection or disease severity status. Responses are centered and scaled per feature and the scale range truncated at  $\pm 3$  SD. Gray cells indicate missing data.

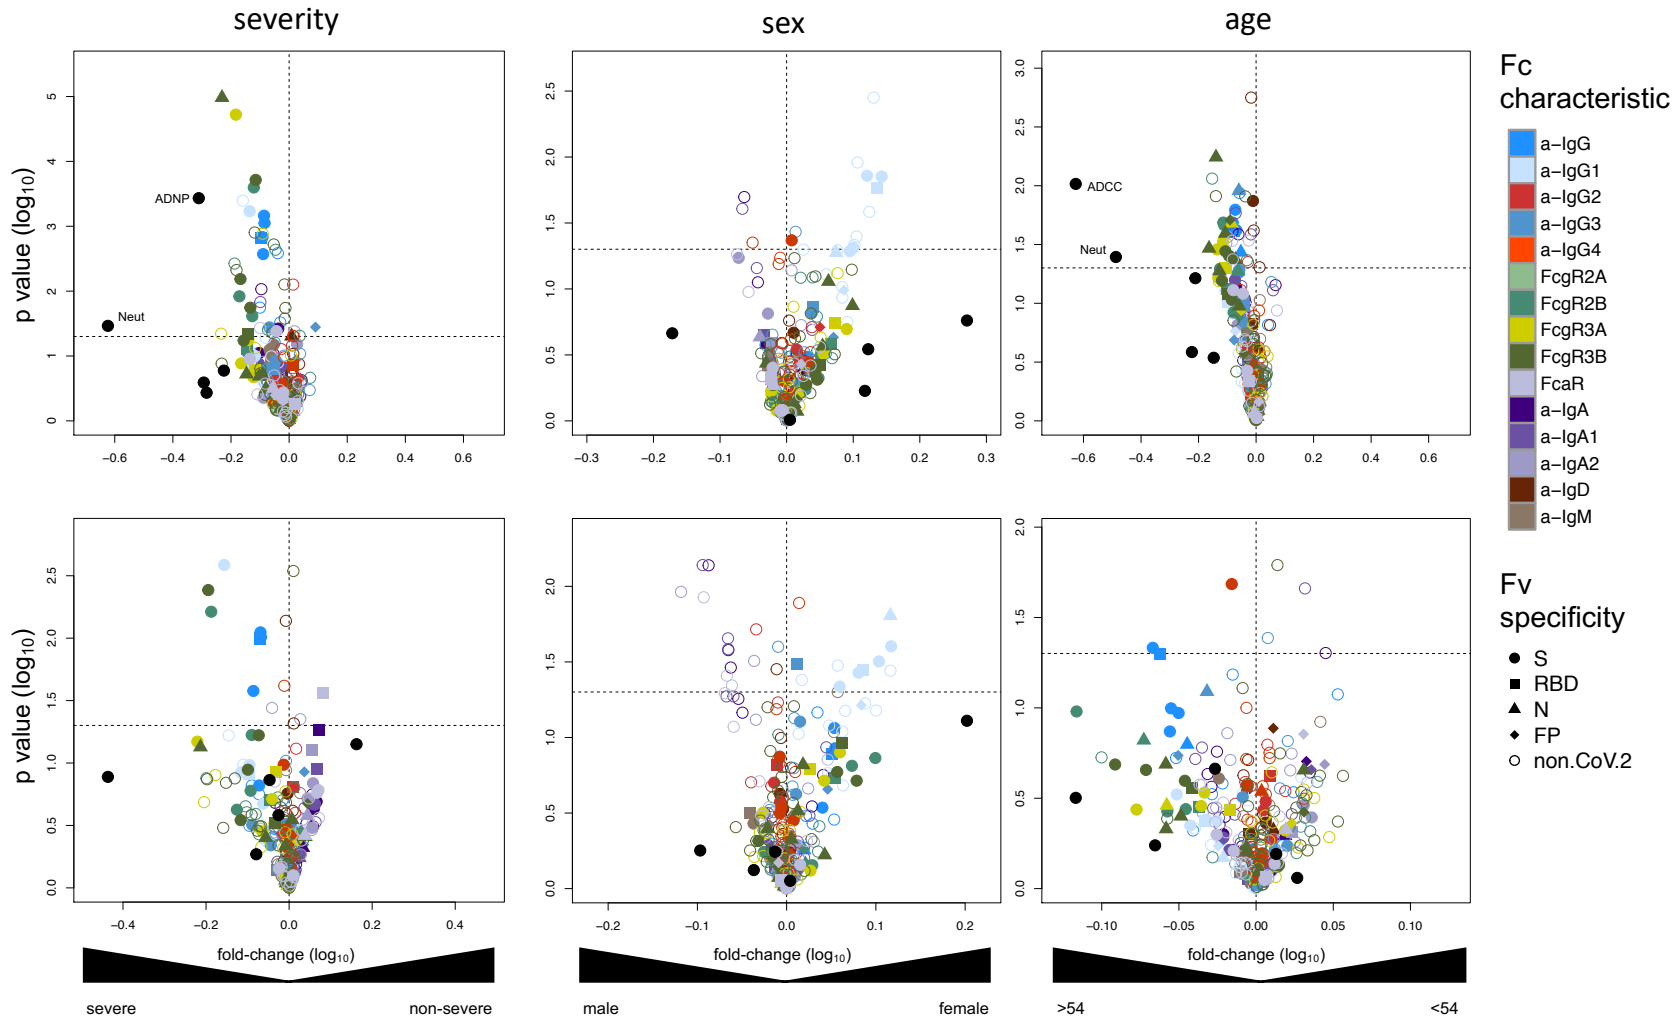

**Supplementary Figure 11. Differences in Ab responses among convalescent donors by subject characteristics.** Volcano plots depicting fold-change and unadjusted statistical significance (unpaired two-tailed t test with Welch's correction) of biophysical and functional response features in serum (top) and nasal wash (bottom) samples by disease severity (left), sex (center), and age (right). Functional assay data is labeled by a black circle with the assay name added if  $p < 0.05$ , and Fc array data is depicted with antigen specificity indicated by shape and Fc characteristic indicated by color. Dotted horizontal line indicates  $p = 0.05$ .



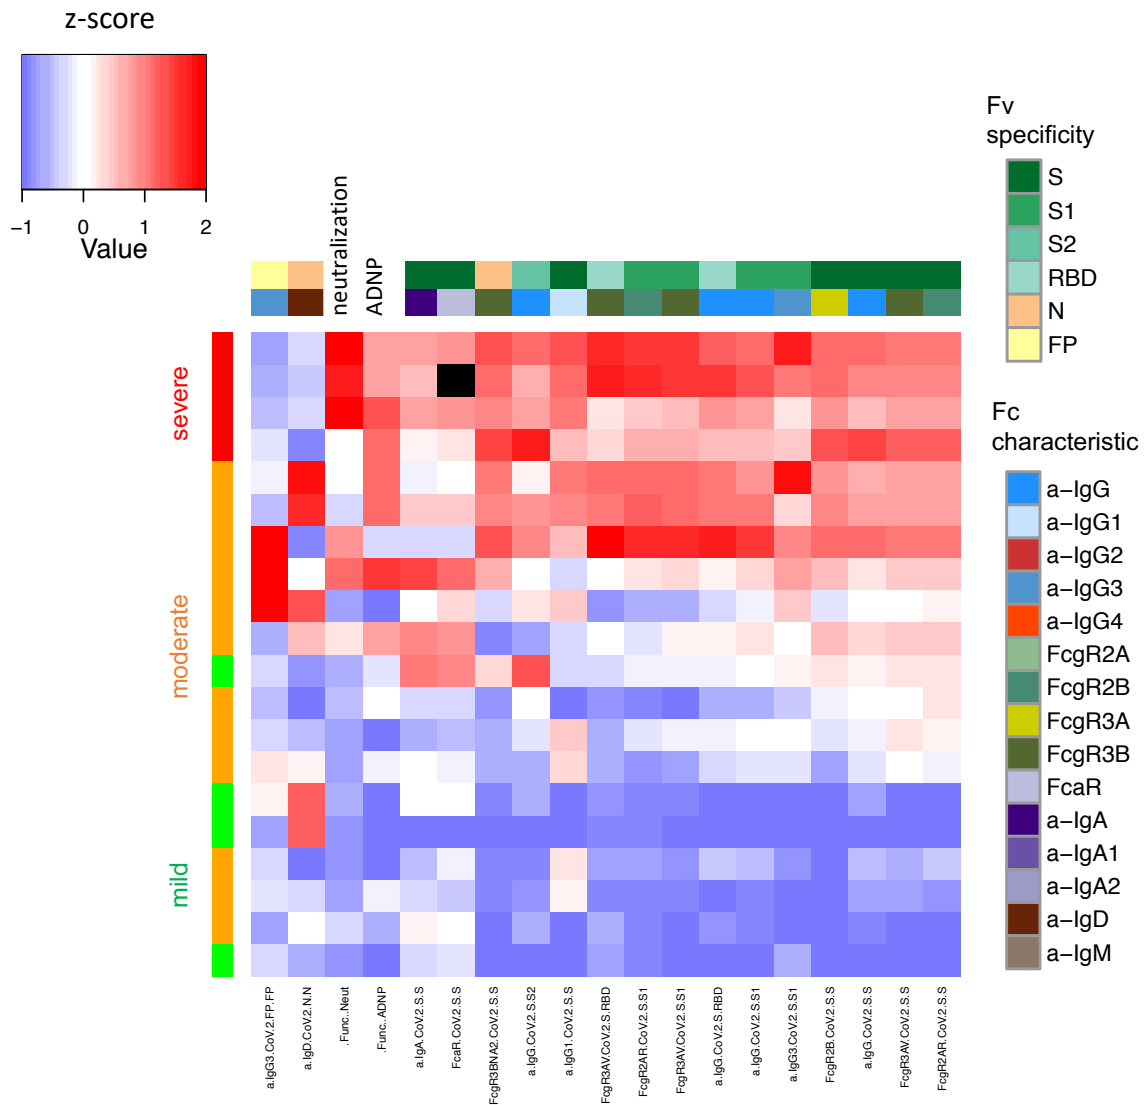

**Supplementary Figure 12. Heatmap of serum Ab features that differ between donors who experienced severe versus non-severe disease.** Features and subjects are hierarchically-clustered with Fv specificity (viral antigen) and Fc characteristic (detection) indicated in x-axis color bar. Subjects are stratified by infection or disease severity status. Responses are centered and scaled per feature and the scale range truncated at +2/-1 SD. Black cell indicates missing data.

**Supplementary Table 1. Antigen and Fc Detection Reagents**

| <b>Antigen</b>                  | <b>Source</b>                      | <b>Fc Detection</b> | <b>Source</b>                       |
|---------------------------------|------------------------------------|---------------------|-------------------------------------|
| H1N1 HA1                        | Immune Technology<br>IT-003-00110p | a- IgG              | Southern Biotech<br>1030-09         |
| HSV gE                          | Immune Technology<br>IT-005-005p   | a-IgG1              | Southern Biotech<br>9054-09         |
| HCoV OC43 S                     | Sino Biological<br>40607-V08B      | a-IgG2              | Southern Biotech<br>9070-09         |
| OC43 S-2P                       | Expressed in HEK<br>293F           | a-IgG3              | Southern Biotech<br>9210-09         |
| 229E S1                         | Sino Biological<br>40605-V08H      | a-IgG4              | Southern Biotech<br>9200-09         |
| 229E S-2P                       | Expressed in Expi<br>293           | a-IgA               | Southern Biotech<br>2050-09         |
| HKU1 S1                         | Sino Biological<br>40606-V08H      | a-IgA1              | Southern Biotech<br>9130-09         |
| HKU S-2P                        | Expressed in Expi<br>293           | a-IgA2              | Southern Biotech<br>9140-09         |
| NL63 S1                         | Sino Biological<br>40604-V08H      | a-IgM               | Southern Biotech<br>9020-09         |
| MERS S1                         | Sino Biological<br>40069-V08H-50   | a-IgD               | Southern Biotech<br>9030-09         |
| MERS S-2P                       | Expressed in Expi<br>293           | Fc $\alpha$ R       | Duke Protein<br>Production Facility |
| SARS CoV-1 S1                   | Sino Biological<br>40150-V08B1     | Fc $\gamma$ R2a     | Boesch, et. al, 2014 <sup>1</sup>   |
| WIV1 S-2P                       | Expressed in Expi<br>293           | Fc $\gamma$ R2b     | Boesch, et. al, 2014 <sup>1</sup>   |
| SARS CoV-2 N                    | Immune Technology<br>IT-002-033Ep  | Fc $\gamma$ R3a     | Boesch, et. al, 2014 <sup>1</sup>   |
| SARS CoV-2 fusion<br>peptide    | New England<br>Peptide             | Fc $\gamma$ R3b     | Boesch, et. al, 2014 <sup>1</sup>   |
| SARS CoV-2 S1 (for Fc<br>Array) | ACROBiosystems<br>S1N-C52H3-100ug  |                     |                                     |
| SARS CoV-2 S1 (for<br>ADCD)     | Sino Biological<br>40150-V08B1-20  |                     |                                     |
| SARS CoV-2 RBD                  | BEI Resources<br>NR-52366          |                     |                                     |
| SARS CoV-2 S2                   | Immune Technology<br>IT-002-034p   |                     |                                     |
| SARS CoV-2 S-2P                 | Expressed in Expi<br>293           |                     |                                     |

<sup>1</sup>Boesch AW, Brown EP, Cheng HD, Ofori MO, Normandin E, Nigrovic PA, et al. Highly parallel characterization of IgG Fc binding interactions. MAbs. 2014;6(4):915-27.

**Supplementary Table 2. CoV Antigen Sequences**

| Antigen              | Sequence (5' → 3')                                                                                                                                                                                                                                                                                                                                                                                                                                                                                                                                                                                                                                                                                                                                                                                                                                                                                                                                                                                                                                                                                                                                                                                                                                                                                                                                                                                                                                                                                                                                                                                                                                                                                                                                                                                                                                                                                                                                                                                                                                                                                                                                                                                                                                                                                                                                                                                                                                                                                                                                                                                                                                                                                                                                                                                                                                                                                                                                                                                                                                                                                                         |
|----------------------|----------------------------------------------------------------------------------------------------------------------------------------------------------------------------------------------------------------------------------------------------------------------------------------------------------------------------------------------------------------------------------------------------------------------------------------------------------------------------------------------------------------------------------------------------------------------------------------------------------------------------------------------------------------------------------------------------------------------------------------------------------------------------------------------------------------------------------------------------------------------------------------------------------------------------------------------------------------------------------------------------------------------------------------------------------------------------------------------------------------------------------------------------------------------------------------------------------------------------------------------------------------------------------------------------------------------------------------------------------------------------------------------------------------------------------------------------------------------------------------------------------------------------------------------------------------------------------------------------------------------------------------------------------------------------------------------------------------------------------------------------------------------------------------------------------------------------------------------------------------------------------------------------------------------------------------------------------------------------------------------------------------------------------------------------------------------------------------------------------------------------------------------------------------------------------------------------------------------------------------------------------------------------------------------------------------------------------------------------------------------------------------------------------------------------------------------------------------------------------------------------------------------------------------------------------------------------------------------------------------------------------------------------------------------------------------------------------------------------------------------------------------------------------------------------------------------------------------------------------------------------------------------------------------------------------------------------------------------------------------------------------------------------------------------------------------------------------------------------------------------------|
| SARS-CoV-2<br>(S-2P) | ATGTTTCGTGTTTCTGGTGCTCCTGCCTCTGGTGAGCAGCCAGTGCGTGAACCTG<br>ACCACCCGAACCCAGCTCCCACCAGCCTACACCAACAGCTTTACACGGGGCGTG<br>TACTACCCTGACAAGGTGTTCCAGATCTAGCGTCTGCACAGCACTCAGGACCTCT<br>TCCTGCCGTTCTTCAGCAACGTGACATGGTTCCACGCCATCCACGTGAGCGGCA<br>CAAACGGAACCAAGCGGTTTGATAACCCCGTCCTGCCATTCAATGATGGAGTTTA<br>CTTCCGCCAGTACCGAGAAGAGTAACATCATCCGGGGCTGGATCTTCGGCACCAC<br>CCTGGATAGCAAAACACAGAGCCTCCTGATCGTGAACAATGCCACGAACGTCGT<br>GATCAAGGTGTGCGAGTTCAGTTTTGCAATGATCCTTTCTGGGTGTGACTAC<br>CACAAGAACAACAAGAGCTGGATGGAAAGCGAGTTCAGAGTCTACAGCAGCGCC<br>AACAACTGCACATTCGAGTACGTCTCTCAGCCTTTTCTGATGGACCTTGAGGGGA<br>AACAAAGGCAACTTCAAGAACCTGAGAGAATTCGTGTTCAAGAACATCGACGGCTA<br>CTTCAAATCTACTCCAAGCACACCCCATCAACCTGGTCCGGGACCTCCCTCAG<br>GGCTTCAGCGCCCTGGAACCCCTGGTCGACCTGCCCATAGGCATCAACATAACG<br>CGTTTCAAACCCCTGCTGGCCCTGCATAGATCCTACCTGACTCCTGGCGACAGC<br>AGCAGCGGATGGACCGCCGGAGCTGCAGCCTACTATGTGGGCTACCTGCAACC<br>TAGAACCTTCTGCTGAAGTACAACGAGAACGGCACAATCACAGACGCCGTCGA<br>CTGCGCCCTGGACCCTCTCTCTGAGACAAAGTGCACCCTGAAGTCCTTACCCT<br>GAAAAGGGCATCTACCAGACCAGCAACTTCCGGGTGCAGCCTACAGAGAGCAT<br>CGTGCGATTTCAAACATTACCAACCTCTGCCCTTCGGCGAGGTGTTTAAACGCC<br>ACAAGATTTGCCTCCGTTTACGCCTGGAATAGAAAGAGAATCAGCAATTGTGTGG<br>CCGACTACTCCGTGCTGTATAACAGCGCCTTTTCAGCACCTTCAAGTGCTACGG<br>CGTTTCCCAACAAAGCTGAATGACCTGTGCTTACCAACGTGTACGCCGACTCC<br>TTCGTAATTAGAGGGCGATGAGGTGCGGCAGATCGCACCAGGCCAGACCGGTAA<br>GATCGCTGACTACAACATAAGCTGCCTGATGATTTTACAGGCTGCGTGATCGCC<br>TGGAACTCTAACAACTGGATAGCAAGGTGGGCGGCAACTACAACCTACCTGTAC<br>CGGCTGTTTCGCAAGTCTAACCTGAAACCTTTCGAGAGAGACATCTCCACAGAGA<br>TCTACCAGGCCGTTCTACACCTTGTAAACGGGTGGAAGGCTTCAACTGTTACTT<br>CCTCTGCAAAGCTACGGCTTCCAGCCTACCAATGGAGTCGGTACCAGCCATA<br>CCGGGTGGTTCGTGCTCCTTCGAGTTACTCCACGCCCCCGCCACCGTCTGCG<br>GTCCTAAGAAGTCCACCAATCTGGTTAAGAACAATGCGTGAACCTTCAACTCAA<br>CGGCCTGACCGGGACCGGCGTGCTGACCGAAAGCAACAAAAAGTTCCTCCCTT<br>CCAGCAGTTCGGCCGTGATATCGCTGACACCACAGATGCCGTCAGAGATCCACA<br>GACCCTGGAAATCCTGGATATTACACCCTGCTCCTTCGGAGGAGTTTCTGTGATC<br>ACCCCCGGGACCAATACCAGCAACCAGGTGGCTGTGCTGTACCAAGATGTTAAC<br>TGCACCGAGGTTCTGTGGCCATCCACGCCGATCAGCTGACACCTACTTGGAGA<br>GTGTACTCCACTGGCTCCAATGTGTTCCAGACCAGGGCCGGATGTCTGATCGGC<br>GCCGAGCACGTGAATAACAGTTACGAGTGCACATCCCTATCGGCGCCGGCAGC<br>TGTGCCAGCTACCAGACCCAGACAAACAGCCCTGGGTCTGCTTCTCTGTAGCT<br>AGCCAGAGCATCATCGCCTACCCATGAGCCTGGGCGCAGAGAACAGCGTGGC<br>CTATTCCAACAACTCTATCGCCATTCCCACCAACTTTACAATTAGCGTCACAACAG<br>AGATCCTGCCCGTGAGCATGACCAAGACCAGCGTGGACTGTACAATGTACATCT<br>GTGGCGACAGCACTGAATGCAGCAACCTGCTGCTGCAATACGGCTCCTTTTGCA<br>CCAACTGAACCGGGCGCTGACCGGAATCGCCGTGGAACAGGACAAAAATACC<br>CAGGAGGTGTTCCGCCAAGTGAAGCAGATCTACAAGACCCACCTATCAAGGAC<br>TTCGGCGGCTTTAACTTTAGCCAGATTCTCCCTGATCCTTCTAAGCCTAGCAAGC<br>GGAGCTTTATCGAGGATCTGCTGTTCAACAAGGTCACCCTGGCCGATGCCGGCT<br>TTATCAAACAGTATGGCGATTGCCTGGGCGACATAGCCGCCAGAGATCTGATCT<br>GCGCCCAGAAATCAACGGCCTGACAGTTCTCCACCTCTGCTGACCGACGAGA<br>TGATCGCTCAGTACACCTCTGCCCTGCTGGCTGGCACCATCACATCTGGGTGGA<br>CATTTGGCGCCGGCGCCGCCCTGCAGATCCCCTTTGCCATGCAGATGGCCTATA<br>GATTC AACGGAATCGGCGTGACCCAGAACGTGCTGTATGAAAACAGAAAGCTGA<br>TCGCTAACAGTTCAATTCTGCCATCGGCAAGATCCAGGACTCCCTCTCTCTAC |

|                              |                                                                                                                                                                                                                                                                                                                                                                                                                                                                                                                                                                                                                                                                                                                                                                                                                                                                                                                                                                                                                                                                                                                                                                                                                                                                                                                                                                                                                                                                                                                                                                                                                                                                                                                                                                                                                                                            |
|------------------------------|------------------------------------------------------------------------------------------------------------------------------------------------------------------------------------------------------------------------------------------------------------------------------------------------------------------------------------------------------------------------------------------------------------------------------------------------------------------------------------------------------------------------------------------------------------------------------------------------------------------------------------------------------------------------------------------------------------------------------------------------------------------------------------------------------------------------------------------------------------------------------------------------------------------------------------------------------------------------------------------------------------------------------------------------------------------------------------------------------------------------------------------------------------------------------------------------------------------------------------------------------------------------------------------------------------------------------------------------------------------------------------------------------------------------------------------------------------------------------------------------------------------------------------------------------------------------------------------------------------------------------------------------------------------------------------------------------------------------------------------------------------------------------------------------------------------------------------------------------------|
|                              | <p>CGCCAGCGCCCTGGGCAAACCTGCAGGACGTGGTGAATCAGAACGCCCAAGCCC<br/> TGAACACCCTGGTGAAGCAGCTCAGCAGCAATTTTGGCGCCATCAGCTCTGTGC<br/> TGAACGATATCCTGTCTAGACTGGACCCTCCAGAAGCCGAAGTCCAGATCGATA<br/> GACTGATCACAGGCAGACTGCAGTCCCTGCAAACCTACGTGACCCAACAGCTGA<br/> TCAGGGCCGCTGAAATAAGAGCCAGCGCCAATCTCGCCGCTACCAAGATGTCCG<br/> AGTGTGTGCTGGGACAGTCTAAACGCGTTGACTTCTGCGGCAAAGGCTATCACC<br/> TGATGAGCTTCCCCAGAGCGCGCCGCACGGCGTGGTGTTCTGCATGTGACAT<br/> ACGTGCCTGCCAAGAGAAGAATTTACAACCGCCCCTGCCATCTGCCACGACG<br/> GCAAGGCCCACTTCCCAAGAGAGGGCGTTTTTCGTTTCCAATGGCACACACTGGT<br/> TCGTGACACAAAGAACTTCTACGAACCCAGATTATCACCACCGACAACACCTT<br/> CGTGAGTGGCAATTGTGACGTGGTCATCGGAATCGTGAACAACACAGTGTACGA<br/> CCCTCTGCAACCTGAGCTGGACTCTTTAAGGAAGAGCTGGACAAGTACTTTAAA<br/> AACCACACCAGCCCCGATGTGGACCTGGGCGACATCAGTGGCATTACGCCAGC<br/> GTGGTGAACATCCAAAAGGAAATCGACAGACTGAACGAGGTGGCCAAGAACCTG<br/> AACGAGTCCCTGATCGACCTGCAGGAGCTCGGCAAATACGAGCAGGGATCCGG<br/> ATACATCCCCGAGGCCCCAGAGATGGCCAGGCCTACGTGCGGAAGGACGGCG<br/> AGTGGTACTGCTGAGCACATTCTGGGCAGATCCCTGGAGGTGCTGTTCCAGG<br/> GCCAGGCCATCACCACCATCACCACCATCATAGCGCCTGGTCCCACCCCCAGT<br/> TCGAGAAGGGCGGCGGTAGTGGAGGGGGCGGATCTGGCGGCTCAGCTTGAG<br/> CCACCCCCAGTTCGAAAAGTGA</p>                                                                                                                                                                                                                                                                                                                                                                                                                                                                                                                                                                                                                                                        |
| <p>SARS-CoV-2<br/>RBD-Fc</p> | <p>ATGCGGCCTACTTGGGCCTGGTGGCTGTTCTGGTGCTGCTGCTAGCTCTGTGG<br/> GCACCCGCTAGAGGGCGGGTGCAGCCTACAGAGAGCATCGTGCGATTTCCAAA<br/> CATTACCAACCTCTGCCCTTCGGCGAGGTGTTTAAACGCCACAAGATTTGCCTCC<br/> GTTTACGCCTGGAATAGAAAGAGAATCAGCAATTGTGTGGCCGACTACTCCGTG<br/> CTGTATAACAGCGCCTCTTTCAGCACCTTCAAGTGCTACGGCGTTTTCCCAACAA<br/> AGCTGAATGACCTGTGCTTACCAACGTGTACGCCGACTCCTTCGTAATTAGAGG<br/> CGATGAGGTGCGGCAGATCGCACCAGGCCAGACCGGTAAGATCGCTGACTACA<br/> ACTATAAGCTGCCTGATGATTTTACAGGCTGCGTGATCGCCTGGAACCTAACA<br/> CCTGGATAGCAAGGTGGGCGGCAACTACAACCTACCTGTACCGGCTGTTTCGCAA<br/> GTCTAACCTGAAACCTTTCGAGAGAGACATCTCCACAGAGATCTACCAGGCCGG<br/> TTCTACACCTTGTAAACGGGGTGAAGGCTTCAACTGTTACTTCCCTCTGCAAAGC<br/> TACGGCTTCCAGCCTACCAATGGAGTCGGCTACCAGCCATACCGGGTGGTCGTG<br/> CTGTCCTTCGAGTTACTCCACGCCCCCGCCACCGTCTGCGGTCTAAGAAGTCC<br/> ACCAATCTGGTTAAGAACAATGCGTGAACCTTCAACTTCAACGGCCTGACCGGGA<br/> CCGGCGTGCTGACCGAAAGCAACAAAAGTTTCTCCCTTCCAGCAGTTCGGCC<br/> GTGATATCGCTGACACCACAGATGCCGTGAGAGATCCACAGACCCTGGAAATCC<br/> TGGATATTACACCCTGCTCCGGATCCCTGGAGGTGCTGTTCCAGGGGCCAACTC<br/> ACACATCCCACCGAGCCAGCACCTGAACTCCTGGGGGGACCGTCAGTCTTCC<br/> TCTTCCCCCAAACCCAAGGACACCCTCATGATCTCCCGGACCCCTGAGGTCA<br/> CATGCGTGGTGGTGGACGTGAGCCACGAAGACCCTGAGGTCAAGTTCAACTGGT<br/> ACGTGGACGGCGTGGAGGTGCATAATGCCAAGACAAAGCCGCGGAGGAGCAG<br/> TACAACAGCACGTACCGTGTGGTCAAGCTCCTCACCGTCTGCACCCAGGACTGG<br/> CTGAATGGCAAGGAGTACAAGTGCAAGGTCTCCAACAAAGCCCTCCAGCCCC<br/> ATCGAGAAAACCATCTCAAAGCCAAAGGGCAGCCCCGAGAACCACAGGTGTAC<br/> ACCAAACCCCATCCCGGGATGAGCTGACCAAGAACCAGGTGAGCCTGTCTCTGC<br/> CTGGTCAAAGGCTTCTATCCAGCGACATCGCCGTGGAGTGGGAGAGCAATGG<br/> GCAGCCGGAGAACAACCTACAAGACCACGGTCCCCGTGCTGGACTCCGACGGCT<br/> CCTTCAGGCTCGCCAGCTATCTCACCGTGGACAAGAGCAGGTGGCAGCAGGGG<br/> AACGTCTTCTCATGCTCCGTGATGCATGAGGCTCTGCACAACCACTACACGCAGA<br/> AGAGCCTCTCCCTGTCTCCGGGTAACATCACCATCATCACCACCATCACTAG</p> |
| <p>SARS-CoV<br/>(S-2P)</p>   | <p>ATGTTTCATCTTCTGCTGTTCTGACCCTGACCAGCGGCAGCGACCTGGACCGG<br/> TGCACCACCTTCGACGACGTGCAGGCCCCCAACTACACCAGCACACCAGCAGC<br/> ATGCGGGGCGTGTACTACCCCGACGAGATCTTCCGGAGCGACACCCTGTACCTG<br/> ACCCAGGACCTGTTCTGCCCTTCTACAGCAACGTGACCGGCTTCCACACCATC<br/> AACCACACCTTCGGCAACCCCGTGATCCCTTCAAGGACGGCATCTACTTCGCC<br/> GCCACCGAGAAGAGCAACGTGGTGCGGGGCTGGGTGTTCCGGCAGCACCATGAA</p>                                                                                                                                                                                                                                                                                                                                                                                                                                                                                                                                                                                                                                                                                                                                                                                                                                                                                                                                                                                                                                                                                                                                                                                                                                                                                                                                                                                                                                                                                      |

CAACAAGAGCCAGAGCGTGATCATCATCAACAACAGCACCAACGTGGTGATCCG  
GGCCTGCAACTTCGAGCTGTGCGACAACCCCTTCTTCGCCGTGAGCAAGCCCAT  
GGGCACCCAGACCCACACCATGATCTTCGACAACGCCTTCAACTGCACCTTCGA  
GTACATCAGCGACGCCTTCAGCCTGGACGTGAGCGAGAAGAGCGGCAACTTCAA  
GCACCTGCGGGAGTTTCGTGTTCAAGAACAAGGACGGCTTCCTGTACGTGTACAA  
GGGCTACCAGCCCATCGACGTGGTGCGGGACCTGCCAGCGGCTTCAACACCC  
TGAAGCCCATCTTCAAGCTGCCCTGGGCATCAACATCACCAACTTCCGGGCCA  
TCCTGACCGCCTTCAGCCCCGCCAGGACATCTGGGGCACCAGCGCCGCCGCC  
TACTTCGTGGGCTACCTGAAGCCCACCACCTTCATGCTGAAGTACGACGAGAAC  
GGCACCATCACCGACGCCGTGGACTGCAGCCAGAACCCCTGGCCGAGCTGAA  
GTGCAGTGTGAAGAGCTTCGAGATCGACAAGGGCATCTACCAGACCAGCAACTT  
CCGGGTGGTGCCAGCGGCGACGTGGTGCGGTTCCCAACATCACCAACTGT  
GCCCTTCGGCGAGGTGTTCAACGCCACCAAGTTCCCAAGCGTGTACGCCTGG  
GAGCGGAAGAAGATCAGCAACTGCGTGGCCGACTACAGCGTGTGTACAACAG  
CACCTTCTTCAGCACCTTCAAGTGCTACGGCGTGAGCGCCACCAAGCTGAACGA  
CCTGTGCTTCAGCAACGTGTACGCCGACAGCTTCGTGGTGAAGGGCGACGCT  
CGGCGAGATCGCCCCCGGCCAGACCGGCGTGATCGCCGACTACAACCTACAAGC  
TGCCCGACGACTTCATGGGCTGCGTGCTGGCCTGGAACACCCGGAACATCGAC  
GCCACCAGCACCGGCAACTACAACCTACAAGTACCGGTACCTGCGGCACGGCAA  
GCTGCGGCCCTTCGAGCGGGACATCAGCAACGTGCCCTTCAGCCCCGACGGCA  
AGCCCTGCACCCCCCGCCCTGAAGTACTGGCCCTGAACGACTACGGCT  
TCTACACCACTACCGGCATCGGCTACCAGCCCTACCGGGTGGTGGTGTGAGCT  
TCGAGCTGCTGAACGCCCGCCACCGTGTGCGGCCCAAGCTGAGCACCGAC  
CTGATCAAGAACCAGTGGTGAACCTCAACTTCAACGGCCTGACCGGCACCGGC  
GTGCTGACCCCCAGCAGCAAGCGGTTCCAGCCCTTCAGCAGTTCGGCCGGGA  
CGTGAGCGACTTCACCGACAGCGTGGGGACCCCAAGACCAGCGAGATCCTGG  
ACATCAGCCCCTGCGCCTTCGGCGGCGTGAGCGTGATCACCCCCGGTACCAAC  
GCCAGCAGCGAGGTGGCCGTGCTGTACCAGGACGTGAAGTGCACCGACGTGAG  
CACCGCCATCCACGCCGACCAGCTGACCCCCGCCTGGCAGATCTACAGCACCG  
GCAACAACGTGTTCCAGACCCAGGCCGGCTGCCTGATCGGCGCCGAGCACGTG  
GACACCAGCTACGAGTGCAGATCCCCATCGGCGCCGGCATCTGCGCCAGCTA  
CCACACCGTGAGCCTGCTGCGGAGCACCAGCCAGAAGAGCATCGTGGCCTACA  
CCATGAGCCTGGGCGCCGACAGCAGCATCGCCTACAGCAACAACACCATCGCC  
ATCCCCACCAACTTCAGCATCAGCATCACCAACCGAGGTGATGCCCGTGAGCATG  
GCCAAGACCAGCGTGGACTGCAACATGTACATCTGCGGCGACAGCACCGAGTG  
CGCCAACCTGCTGCTGCAGTACGGCAGCTTCTGCACCCAGCTGAACCGGGCCC  
TGAGCGGCATCGCCGCCGAGCAGGACCGGAACACCCGGGAGGTGTTCCGCCA  
GGTGAAGCAGATGTACAAGACCCCCACCCTGAAGTACTTCGGCGGCTTCAACTT  
CAGCCAGATCCTGCCCGACCCCTGAAGCCACCAAGCGGAGCTTATGAAAGCAGTACG  
ACCTGCTGTCAACAAGGTGACCTGCCCCGACGCGGCTTCAAGCAGTACG  
CGAGTGCCTGGGCGACATCAACGCCCCGGACCTGATCTGCGCCAGAAGTTC  
AACGGCCTGACCGTGCTGCCCCCCCTGCTGACCGACGACATGATCGCCGCCTA  
CACCGCCGCCCTGGTGAGCGGCACCGCCACCGCCGGCTGGACCTTCGGCGCC  
GGCGCCGCCCTGCAGATCCCCTTCGCCATGCAGATGGCCTACCGGTTCAACGG  
CATCGGCGTGACCCAGAACGTGCTGTACGAGAACCAGAAGCAGATCGCCAACCA  
GTTCAACAAGGCCATCAGCCAGATCCAGGAGAGCCTGACCACCACCAGCACCGC  
CCTGGGCAAGCTGCAGGACGTGGTGAACCAGAACGCCAGGCCCTGAACACCC  
TGGTGAAGCAGCTGAGCTCCAACTTCGGCGCCATCAGCAGCGTGTGAACGACA  
TCCTGAGCCGGCTGGACCCCCCGAGGCCGAGGTGCAGATCGACCGGCTGATC  
ACCGGCCGGCTGCAGAGCCTGCAGACCTACGTGACCCAGCAGCTGATCCGGGC  
CGCCGAGATCCGGGCCAGCGCAACCTGGCCGCCACCAAGATGAGCGAGTGCG  
TGCTGGGCCAGAGCAAGCGGGTGGACTTCTGCGGCAAGGGCTACCACCTGATG  
AGTTCCCCCAGGCCGCCCCCCACGGCGTGGTGTTCCTGCACGTGACCTACGT  
GCCAGCCAGGAGCGGAACCTTACCACCGCCCCCGCCATCTGCCACGAGGGCA  
AGGCCTACTTCCCCGGGAGGGCGTTCGTGTTCAACGGCACCAGCTGGTTCA  
TCACCCAGCGGAACCTTCTCAGCCCCAGATCATCACCAACGACAACACCTTCGT

|             |                                                                                                                                                                                                                                                                                                                                                                                                                                                                                                                                                                                                                                                                                                                                                                                                                                                                                                                                                                                                                                                                                                                                                                                                                                                                                                                                                                                                                                                                                                                                                                                                                                                                                                                                                                                                                                                                                                                                                                                                                                                                                                                                                                                                                                                                                                                                                                                                                                                                                                                                                                                                                                                                                                                                                                                                                                                                                    |
|-------------|------------------------------------------------------------------------------------------------------------------------------------------------------------------------------------------------------------------------------------------------------------------------------------------------------------------------------------------------------------------------------------------------------------------------------------------------------------------------------------------------------------------------------------------------------------------------------------------------------------------------------------------------------------------------------------------------------------------------------------------------------------------------------------------------------------------------------------------------------------------------------------------------------------------------------------------------------------------------------------------------------------------------------------------------------------------------------------------------------------------------------------------------------------------------------------------------------------------------------------------------------------------------------------------------------------------------------------------------------------------------------------------------------------------------------------------------------------------------------------------------------------------------------------------------------------------------------------------------------------------------------------------------------------------------------------------------------------------------------------------------------------------------------------------------------------------------------------------------------------------------------------------------------------------------------------------------------------------------------------------------------------------------------------------------------------------------------------------------------------------------------------------------------------------------------------------------------------------------------------------------------------------------------------------------------------------------------------------------------------------------------------------------------------------------------------------------------------------------------------------------------------------------------------------------------------------------------------------------------------------------------------------------------------------------------------------------------------------------------------------------------------------------------------------------------------------------------------------------------------------------------------|
|             | <p>GAGCGGCAACTGCGACGTGGTGATCGGCATCATCAACAACACCGTGTACGACCC<br/>CCTGCAGCCCGAGCTGGACAGCTTCAAGGAGGAGCTGGACAAGTACTTCAAGAA<br/>CCACACCAGCCCCGACGTGGACCTGGGCGACATCAGCGGCATCAACGCCAGCG<br/>TGGTGAACATCCAGAAGGAGATCGACCGGCTGAACGAGGTGGCCAAGAACCTG<br/>AACGAGAGCCTGATCGACCTGCAGGAGCTGGGCAAGTACGAGCAGGGATCCGG<br/>ATACATCCCCGAGGCCCCAGAGATGGCCAGGCCTACGTGCGGAAGGACGGCG<br/>AGTGGGTAAGTGTGAGCACATTCCTGGGCAGATCCCTGGAGGTGCTGTTCCAGG<br/>GCCAGGCCACCACCACCACCACCATCATAGCGCCTGGTCCCACCCCCAGT<br/>TCGAGAAGTGA</p>                                                                                                                                                                                                                                                                                                                                                                                                                                                                                                                                                                                                                                                                                                                                                                                                                                                                                                                                                                                                                                                                                                                                                                                                                                                                                                                                                                                                                                                                                                                                                                                                                                                                                                                                                                                                                                                                                                                                                                                                                                                                                                                                                                                                                                                                                                                                                                                  |
| MERS (S-2P) | <p>ATGATTCACTCCGTGTTCTGCTGATGTTCTGCTGACTCCTACAGAGAGCTATG<br/>TGGATGTGGGACCTGATTCCGTCAAGAGCGCCTGCATCGAAGTGGACATTACAGC<br/>AGACCTTCTTTGATAAGACATGGCCAAGACCCATCGACGTGAGCAAAGCCGATG<br/>GCATCATCTACCCTCAGGGGAGGACCTATTCCAATATCACAATTACTTACCAGGG<br/>CCTGTTCCCATATCAGGGAGACCACGGCGATATGTACGTGTATTCTGCTGGCCAT<br/>GCAACAGGGACCACACCTCAGAAGCTGTTTGTGGCTAACTACAGCCAGGACGTC<br/>AAACAGTTTCGCAAATGGATTTGTGGTCCGCATCGGCGCCGTCGAAACTCTACC<br/>GGCACAGTGATCATTTCACCTAGCACTTCCGCAACCATCCGAAAAATCTACCCAG<br/>CCTTCATGCTGGGAAGTCCGTGGGCAATTTTAGCGACGGGAAAAATGGGACGGT<br/>TCTTTAACCACACCCTGGTGCTGCTGCCTGATGGATGCGGCACACTGCTGAGGG<br/>CTTTCTACTGTATCCTGGAGCCACGCAGCGGAAACCACTGCCCGCAGGAAATA<br/>GCTACACCTCCTTTGCCACATATCATACTCCAGCTACCGACTGTTCCGATGGCAA<br/>CTACAATCGAAACGCCTCTCTGAATAGTTTCAAGGAATACTTCAACCTGCGGAAT<br/>TGCACATTCATGTACACTTATAACATCACCGAGGACGAAATTCTGGAGTGGTTCG<br/>GAATCACTCAGACCGCACAGGGCGTGACCTGTTTTCTAGTCGCTACGTCGACC<br/>TGTATGGCGGGAACATGTTCCAGTTTGCCACTCTGCCCGTGTACGATACCATCAA<br/>GTACTATTCCATCATTCTCATTCAATCCGCAGCATTAGTCCGATCGAAAGGCTT<br/>GGGCGCTTTCTACGTGTATAAACTGCAGCCACTGACCTTCTGCTGGACTTTAG<br/>CGTCGATGGCTACATCCGGAGAGCCATTGACTGCGGGTTTAAATGATCTGTCCA<br/>GCTGCACTGTTCTTACGAAAGTTTCGACGTGGAGTCCGGCGTGTATTCTGTCTCA<br/>AGCTTTGAGGCCAAGCCCTCTGGGAGTGTGGTTCGAGCAGGCTGAAGGAGTGGGA<br/>GTGCGATTCAGTCTCTGCTGTCAGGGACCCCCCTCAGGTGTACAACCTCAA<br/>GCGGCTGGTCTTTACTAACTGTAACATACTGACCAAGCTGCTGTCACTGTTT<br/>AGCGTGAATGACTTTACATGCTCCAGATCAGCCCCGACGCCATTGCTAGTAACT<br/>GTTACTCTCTGATCCTGGACTACTTCTCATATCCACTGAGTATGAAGAGCGA<br/>CCTGAGCGTGAGTTCAGCCGGCCCCATCAGCCAGTTCAACTATAAACAGAGCTT<br/>CAGCAATCCTACATGCCTGATTCTGGCTACTGTGCCACATAATCTGACTACCATC<br/>ACTAAGCCCCTGAAATACTCCTATATTAACAAGTGCAGCCGGTTCCTGTCCGACG<br/>ATAGAACCGAAGTGCCACAGCTGGTCAACGCCAATCAGTACTCTCCCTGTGTGA<br/>GTATCGTCCCTTCAACCGTGTGGGAAGACGGGGATTACTATAGAAAACAGCTGA<br/>GCCCCCTGGAGGGAGGAGGATGGCTGGTGGCATCCGATCTACAGTCGCCATG<br/>ACTGAGCAGCTGCAGATGGGGTTCGGAATCACAGTGCAGTACGGCACAGACACT<br/>AACTCTGTCTGTCCCAAGCTGGAATTCGCTAACGATACTAAGATCGCAAGTCAGC<br/>TGGGAAACTGCGTGGAGTACTCTCTGTATGGCGTGTGAGTGGCAGAGGGGTCTTCC<br/>AGAATTGTACCGCAGTGGGCGTCCGACAGCAGCGTTTTGTGTACGACGCCTATC<br/>AGAATCTGGTTCGGCTACTATAGCGACGATGGGAACTACTATTGCCTGAGGGCCT<br/>GTGTGAGCGTCCCTGTGTCCGTCTACGATAAGGAAACCAAAACACACGCCA<br/>CACTGTTCCGGGTCCGTGGCTTGCAGCATATTAGCTCCACAATGTCTCAGTACAG<br/>TAGATCAACTAGGTCAATGCTGAAGAGGCGCGATAGCACCTATGGACCTCTGCA<br/>GACACCAGTGGGGTGTGTCTGGGACTGGTGAACCTCTAGTCTGTTTGTGAGGA<br/>CTGCAAGCTGCCCTGGGCCAGAGCCTGTGCGCCCTGCCCGACACCCCCAGCA<br/>CCCTGACCCCCGCCAGCGTGGGCAGCGTGCCCGGCGAGATGCGGCTGGCCAG<br/>CATCGCCTTCAACCACCCCATCCAGGTGGACCAGCTGAACAGCAGCTACTTCAA<br/>GCTGAGCATCCCCACCAACTTCAGCTTCCGGCGTGACCCAGGAGTACATCCAGAC<br/>CACCATCCAGAAGGTGACCGTGGACTGCAAGCAGTACGTGTGCAACGGCTTCCA<br/>GAAGTGCGAGCAGCTGCTGCGGGAGTACGGCCAGTTCTGCAGCAAGATCAACC<br/>AGGCCCTGCACGGCGCCAACCTGCGGCAGGACGACAGCGTGCGGAACCTGTTT</p> |

|             |                                                                                                                                                                                                                                                                                                                                                                                                                                                                                                                                                                                                                                                                                                                                                                                                                                                                                                                                                                                                                                                                                                                                                                                                                                                                                                                                                                                                                                                                                                                                                                                                                                                                                                                                                                                                             |
|-------------|-------------------------------------------------------------------------------------------------------------------------------------------------------------------------------------------------------------------------------------------------------------------------------------------------------------------------------------------------------------------------------------------------------------------------------------------------------------------------------------------------------------------------------------------------------------------------------------------------------------------------------------------------------------------------------------------------------------------------------------------------------------------------------------------------------------------------------------------------------------------------------------------------------------------------------------------------------------------------------------------------------------------------------------------------------------------------------------------------------------------------------------------------------------------------------------------------------------------------------------------------------------------------------------------------------------------------------------------------------------------------------------------------------------------------------------------------------------------------------------------------------------------------------------------------------------------------------------------------------------------------------------------------------------------------------------------------------------------------------------------------------------------------------------------------------------|
|             | <p>GCTAGCGTGAAGAGCAGCCAGAGCAGCCCCATCATCCCCGGCTTCGGCGGCGA<br/> CTTCAACCTGACCCTGCTGGAGCCCCTGAGCATCAGCACCGGCAGCCGGAGCG<br/> CCCGGAGCGCCATCGAGGACCTGCTGTTTCGACAAGGTGACCATCGCCGACCCC<br/> GGCTACATGCAGGGCTACGACGACTGCATGCAGCAGGGCCCCGCCAGCGCCCG<br/> GGACCTGATCTGCGCCAGTACGTGGCCGGCTACAAGGTGCTGCCCCCCCTGA<br/> TGGACGTGAACATGGAGGCCGCCTACACCAGCAGCCTGCTGGGCAGCATCGCC<br/> GGCGTGGGCTGGACCGCCGGCCTGAGCAGCTTCGCCGCCATCCCCTTCGCCCA<br/> GAGCATCTTCTACCGGCTGAACGGCGTGGGCATCACCCAGCAGGTGCTGAGCG<br/> AGAACCAGAAGCTGATCGCCAACAAGTTCAACCAGGCCCTGGGCGCCATGCAGA<br/> CCGGCTTCACCACCACCAACGAGGCCTTCCACAAGGTGCAGGACGCCGTGAAC<br/> AACACGCCCCAGGCCCTGAGCAAGCTGGCCAGCGAGCTGAGCAACACCTTCGG<br/> CGCCATCAGCGCCAGCATCGGCGACATCATCCAGCGGCTGGACCCCCCGAGC<br/> AGGACGCCCAGATCGACCGGCTGATCAACGGCCGGCTGACCACCCTGAACGCC<br/> TTCGTGGCCCAGCAGCTGGTGCAGGAGCAGAGCGCCGCCCTGAGCGCCCAGCT<br/> GGCCAAGGACAAGGTGAACGAGTGCCTGAAGGCCCAGAGCAAGCGGAGCGGCT<br/> TCTGCGGCCAGGGCACCCACATCGTGAGCTTCGTGGTGAACGCCCCCAACGGC<br/> CTGTACTTTCATGCACGTGGGCTACTACCCAGCAACCACATCGAGGTGGTGAAC<br/> GCCTACGGCCTGTGCGACGCCCAACCCACCAACTGCATCGCCCCCGTGAA<br/> CGGCTACTTCATCAAGACCAACAACACCCGGATCGTGGACGAGTGGAGCTACAC<br/> CGGCAGCAGCTTCTACGCCCCGAGCCCATCACCCAGCCTGAACACCAAGTACGT<br/> GGCCCCCAGGTGACCTACCAGAACATCAGCACCAACCTGCCCCCCCCCCCTGCT<br/> GGGCAACAGCACCGGCATCGACTTCCAGGACGAGCTGGACGAGTTCTTCAAGAA<br/> CGTGAGCACCAGCATCCCCAATTTCGGCAGCCTGACCCAGATCAACACCACCCT<br/> GCTGGACCTGACCTACGAGATGCTGAGCCTGCAGCAGGTGGTGAAGGCCCTGA<br/> ACGAGAGCTACATCGACCTGAAGGAGCTGGGCAACTACACCTACGGATCCGGAT<br/> ACATCCCCGAGGCCCCAGAGATGGCCAGGCCTACGTGCGGAAGGACGGCGAG<br/> TGGTACTGCTGAGCACATTCCTGGGCAGATCCCTGGAGGTGCTGTTCCAGGGC<br/> CCAGGCCATCACACCATCACACCATCATAGCGCCTGGTCCCACCCCCAGTTC<br/> GAGAAGGGCGGCGGTAGTGGAGGGGGCGGATCTGGCGGCTCAGCTTGGAGCC<br/> ACCCCCAGTTCGAAAAGTGA</p> |
| 229E (S-2P) | <p>ATGTTTGTGCTGCTGGTGGCCTATGCACTGCTGCACATCGCAGGATGCCAGACC<br/> ACAAACGGCACCAATACAAGCCACTCCGTGTGCAACGGATGCGTGGGACACAGC<br/> GAGAACGTGTTTCGAGTGGAGAGCGGAGGATACATCCCATCCAATTTTCGCCTT<br/> AACAAATTGGTTCCTGCTGACCAACACAAGCTCCGTGGTGGACGGCGTGGTGAGA<br/> TCCTTTTCAGCCTCTGCTGCTGAACTGCCTGTGGTCTGTGAGCGGCTCCCAGTTCA<br/> CCACAGGCTTCGTGTACTTTAATGGCACCGGCAGAGGGCGCCTGTAAGGGCTTCT<br/> ACTCTAACGCCTCTAGCGACGTGATCAGGTATAACATCAATTTTGAGGAGAATCT<br/> GCGGAGAGGCACAATCCTGTTTAAGACCTCCTACGGCGCCGTGGTGTTCATTG<br/> CACAAACAATACCCTGGTGTCCGGCGATGCCACATCCCATCTGGCACCGTGTCT<br/> GGGCAACTTCTATTGTTTTGTGAACACCACAATCGGCAATGAGACCACAAGCGCC<br/> TTTGTGGGCGCCCTGCCAAAGACCGTGCAGGTTTCGTGATCAGCCGGACAGG<br/> CCACTTTTACATCAATGGCTACAGGTATTTCTCCCTGGGCGACGTGGAGGCCGT<br/> GAACTTCAATGTGACCAACGCCGCCACCACAGTGTGCACAGTGGCCCTGGCCAG<br/> CTATGCCGATGTGCTGGTGAACGTGTCCCAGACCGCCATCGCCAATATCATCTA<br/> CTGCAACTCCGTGATCAATCGGCTGAGATGTGACCAGCTGTCTTTCGACGTGCC<br/> TGATGGCTTTTATTCTACAAGCCCCATCCAGCCTGTGGAGCTGCCCGTGAGCATC<br/> GTGAGCCTGCCAGTGTACCACAAGCACACCTTCATCGTGCTGTATGTGAATTTTG<br/> AGCACAGGAGGGGACCTGGCAAGTGCTACAAGTGTGCGCCTGCCGTGATCAATA<br/> TCACCCTGGCCAACTTCAATGAGACAAAGGGCCCTCTGTGCGTGGACACAAGCC<br/> ACTTCACCACACAGTTTGTGGATAACGTGAAGCTGGCCCCGGTGGTCCGCCTCTA<br/> TCAACACCGGCAATTGTCCATTCTCCTTTGGCAAGGTGAACAATTTTCGTGAAGTT<br/> TGGCAGCGTGTGCTTTAGCCTGAAGGATATCCCAGGCGGCTGTGCCATGCCCAT<br/> CATGGCCAACCTGGTGAATAGCAAGTCCCACAATATCGGCAGCCTGTACGTGTC<br/> TTGGAGCGACGGCGATGTGATCACAGGCGTGCCTAAGCCAGTGGAGGGCGTGT<br/> CCTCTTTCATGAACGTGACACTGAATAAGTGCACCAAGTACAACATCTATGACGT<br/> GAGCGGCGTGGGCGTGTATCCGCATCTCCAACGATACCTTTCTGAATGGCATCAC</p>                                                                                                                                                                          |

|                    |                                                                                                                                                                                                                                                                                                                                                                                                                                                                                                                                                                                                                                                                                                                                                                                                                                                                                                                                                                                                                                                                                                                                                                                                                                                                                                                                                                                                                                                                                                                                                                                                                                                                                                                                                                                                                                                                                                                                                                                                                                                                                                                                                                                                                                                                                                                                                                                                                                                                                             |
|--------------------|---------------------------------------------------------------------------------------------------------------------------------------------------------------------------------------------------------------------------------------------------------------------------------------------------------------------------------------------------------------------------------------------------------------------------------------------------------------------------------------------------------------------------------------------------------------------------------------------------------------------------------------------------------------------------------------------------------------------------------------------------------------------------------------------------------------------------------------------------------------------------------------------------------------------------------------------------------------------------------------------------------------------------------------------------------------------------------------------------------------------------------------------------------------------------------------------------------------------------------------------------------------------------------------------------------------------------------------------------------------------------------------------------------------------------------------------------------------------------------------------------------------------------------------------------------------------------------------------------------------------------------------------------------------------------------------------------------------------------------------------------------------------------------------------------------------------------------------------------------------------------------------------------------------------------------------------------------------------------------------------------------------------------------------------------------------------------------------------------------------------------------------------------------------------------------------------------------------------------------------------------------------------------------------------------------------------------------------------------------------------------------------------------------------------------------------------------------------------------------------------|
|                    | <p>CTATACATCCACCTCTGGCAATCTGCTGGGCTTCAAGGACGTGACAAACGGCAC<br/> CATCTACAGCATCACACCATGTAATCCCCCTGATCAGCTGGTGGTGTATCAGCAG<br/> GCAGTGGTGGGAGCAATGCTGTCCGAGAACTTACCTCCTACGGCTTTTCTAAT<br/> GTGGTGGAGATGCCAAGTTCTTTTACGCCTCTAACGGCACATATAATTGCACCG<br/> ACGCCGTGCTGACATATAGCAGCTTCGGCGTGTGCGCCGATGGCTCTATCATCG<br/> CCGTGCAGCCTCGGAACGTGAGCTACGACAGCGTGTCCGCCATCGTGACCGCC<br/> AACCTGTCTATCCCTTTCAATTGGACCACAAGCGTGCAGGTGGAGTACCTGCAGA<br/> TCACATCCACCCCAATCGTGGTGGACTGCTCTACCTACGTGTGCAACGGCAATG<br/> TGCGCTGCGTGGAGCTGCTGAAGCAGTACACAAGCGCCTGTAAGACCATCGAG<br/> GATGCCCTGCGGAACTCCGCCATGCTGGAGAGCGCCGACGTGTCCGAGATGCT<br/> GACCTTCGATAAGAAGGCCTTTACTGCGCAACGTGTCTAGCTTTGGCGACTAT<br/> AATCTGTCTCTGTGATCCCATCTCTGCCACGGTCTGGCAGCAGAGTGGCAGGC<br/> AGGAGCGCCATCGAGGATATCCTGTTCTCTAAGCTGGTGACAAGCGGACTGGGC<br/> ACCGTGGACGCCGATTACAAGAAGTGCACCAAGGGACTGAGCATCGCAGACCTG<br/> GCATGTGCCCAGTACTATAACGGAATCATGGTGTGCCAGGAGTGGCAGATGCA<br/> GAGCGCATGGCCATGTATACAGGCTCCCTGATCGGCCGCGACTCGCCCTGGGGA<br/> ACTGACCTCCGCCGATCTATCCCTTTCTCCCTGGCCATCCAGTCTCGCCTGAAT<br/> TACGTGGCCCTGCAGACCGACGTGCTGCAGGAGAACCAGAGAATCCTGGCCGC<br/> CAGCTTCAACAAGGCCATGACCAATATCGTGGACGCCTTTACAGGCGTGAATGAT<br/> GCCATCACACAGACCTCCAGGCCCTGCAGACAGTGGCAACCGCCCTGAACAA<br/> GATCCAGGATGTGGTGAATCAGCAGGGCAACTCTCTGAATCACCTGACCAGCCA<br/> GCTGAGACAGAACTTTCAGGCCATCAGCTCCTCTATCCAGGCCATCTACGACAG<br/> GCTGGACCCCCACAGGCAGACCAGCAGGTGGATAGACTGATCACAGGCAGGC<br/> TGGCCGCCCTGAACGTGTTCTGTGAGCCACACACTGACCAAGTATACCGAGGTGA<br/> GGGCATCTAGGCAGCTGGCACAGCAGAAGGTGAACGAGTGCCTGAAGTCCCAG<br/> TCTAAGAGATACGGCTTTTGTGGCAATGGCACCCACATCTTCAGCCTGGTGAACG<br/> CAGCACCAGAGGGACTGGTGTTCCTGCACACAGTGCTGCTGCCACCCAGTACA<br/> AGGACGTGGAGGCATGGTCCGGACTGTGCGTGGATGGCATCAACGGCTACGTG<br/> CTGAGGCAGCCAAATCTGGCCCTGTATAAGGAGGGCAACTACTATCGCATCACC<br/> AGCCGGATCATGTTTGAGCCTAGAATCCCAACAATCGCCGACTTCGTGCAGATC<br/> GAGAACTGTAATGTGACCTTTGTAACATCAGCAGGTCCGAGCTGCAGACAATC<br/> GTGCCCGAGTACATCGACGTGAATAAGACCCTGCAGGAGCTGTCTTACAAGCTG<br/> CCCAACTATACCGTGCCTGATCTGGTGGTGGAGCAGTATAACCAGACAATCCTG<br/> AATCTGACCAGCGAGATCTCCACACTGGAGAACAAGTCTGCCGAGCTGAATTAC<br/> ACCGTGCAGAAGCTGCAGACACTGATCGACAACATCAATAGCACACTGGTGGAT<br/> CTGAAGTGGCTGAACCGGGTGGAGACCGGATCCGGATACATCCCCGAGGCCCC<br/> CAGAGATGGCCAGGCCTACGTGCGGAAGGACGGCGAGTGGGTACTGCTGAGCA<br/> CATTCTGGGCAGATCCCTGGAGGTGCTGTTCCAGGGCCCAGGCCATCACCACC<br/> ATCACCACCATCATAGCGCCTGGTCCCACCCCCAGTTCGAGAAGGGCGGCGGTA<br/> GTGGAGGGGGCGGATCTGGCGGCTCAGCTTGGAGCCACCCCCAGTTCGAAAAG<br/> TGA</p> |
| <p>HKU1 (S-2P)</p> | <p>ATGTTTCTGATTATCTTTATTCTGCCACTACCCTGGCCGTCATTGGAGACTTCAA<br/> CTGCACTAACTCATTCAATTAACGACTACAACAAGACAATCCCCCGCATTTCGAG<br/> GATGTGGTGCAGTGTCTCTGGGGCTGGGAACATACTATGTGCTGAATCGAGTC<br/> TATCTGAACACCACACTGCTGTTTACTGGATACTTCCCTAAATCCGGCGCCA<br/> TCCGCGACCTGGCTCTGAAGGGCTCAATCTACCTGAGCACCCTGTGGTACAAC<br/> CCCCTTTTCTGTGAGATTTCAACAATGGGATCTTTAGCAAGGTGAAGAACA<br/> GCTGTACGTCAACAACACCCTGACTCTGAATTCAGTACAATCGTGATTGGATCT<br/> GTCTTTGTGAACACTAGTTATACCATCGTGGTCCAGCCTCACAATGGCATCCTGG<br/> AGATTACCGCCTGTGAGTATAAATGTGCGAATACCCACACACCCTGTGCAAGTC<br/> AAAAGGCAGCATTAGAAACGAGTCTGGCATATCGATAGCTCCGAACCCCTGTG<br/> CCTGTTTAAGAAAACTTACATAACAACGTGAGCGCCGACTGGCTGTATTTCCAC<br/> TTTTACCAGGAGAGGGGAGTGTCTATGCCTACTATGCTGATGTCGGCATGCCAA<br/> CTACCTTCTGTTTTCCCTGTACCTGGGCACAATTCTGTCTCATTACTATGTGATG<br/> CCCCTGACTTGAACGCCATCTCTAGTAACACCGACAATGAGACACTGGAATATT<br/> GGGTGACCCCTCTGTCCCGGAGACAGTACCTGCTGAACTTCGATGAGCACGGC</p>                                                                                                                                                                                                                                                                                                                                                                                                                                                                                                                                                                                                                                                                                                                                                                                                                                                                                                                                                                                                                                                                                                                                                                                                                                                                                                                                                                                                                                                                                                                                                            |



GTGATTACAAATGCTGTGCGACTGTTCAAGCTCCTTCCTGAGTGAAATCCAGTGCA  
AGACTCAGTCATTTGCACCTAACACCGGGGTGTATGATCTGTCTGGCTTCACCGT  
CAAACCAGTGGCCACTGTCTACAGGCGCATTCCAAACCTGCCCGACTGTGATAT  
CGACAATTGGCTGAACAATGTCTCCGTGCCATCTCCCCTGAATTGGGAGCGACG  
GATCTTCAGCAACTGCAATTTCAACCTGTCAACTCTGCTGAGACTGGTCCATGTG  
GATTCATTAGCTGTAACAATCTGGACAAGAGCAAATCTTTGGCTCCTGCTTCA  
ACTCTATTACCGTGGACAAGTTCGCCATCCCAAATAGAAGGCGCGACGATCTGC  
AGCTGGGGTCTAGTGGATTTCTGCAGTCAAGCAACTACAAGATCGATATTTCCCTC  
TAGTTCATGCCAGCTGTAATAAGCCTGCCACTGGTCAATGTGACCATCAACAAT  
TTCAATCCCAGCTCCTGGAACCGACGGTACGGCTTCGGGTCTTTAACCTGTCTA  
GTTATGATGTGGTCTACTCTGACCACTGTTTTAGTGTGAACTCAGATTTCTGTCT  
TGCGCAGACCCAAGTGTGGTCAATTCATGCGCCAAGAGCAAACCACCTCCGCT  
ATTTGTCCTGCAGGCACAAAGTATAGGCATTGCGATCTGGACACAACCTCTGTACG  
TGAAAACTGGTGTGCTGCAGCTGTCTGCCTGACCAATCAGCACTTACTCCCC  
CAATACCTGCCCTCAGAAGAAAGTGGTCTGGGAATTGGCGAGCACTGCTCTGG  
GCTGGGAATCAACGAGGAAAAGTGGGACCCAGCTGAATCATTCAAGCTGCTT  
CTGTTCCCCAGATGCCTTTCTGGGATGGTCTTTTCGACAGTTGATTTCAAACAAC  
AGGTGCAACATCTTTTCTAATTTTCACTTTAACGGGATTAATAGTGAACCACATG  
TTCAAACGATCTGCTGTACAGCAATACTGAGATCAGCACCAGCGCTGCGTGAA  
CTATGACCTGTACGGGATCACAGGCCAGGGGATTTTCAAGGAAGTGAAGCGCCG  
TACTATAACAATTGGCAGAACCTGCTGTATGATAGCAATGGCAACATCATTGGG  
TTCAAAGGACTTTCTGACCAACAAGACATATACTATCCTGCCCTGCTACTCTGGCA  
GAGTGAGTGCAGCCTTCTACCAGAACTCCTCTAGTCCTGCCCTGCTGTATAGGAA  
TCTGAAGTGTAGCTACGTGCTGAACAATATCAGCTTTATTTCCAGCCATTCTATT  
TTGACAGCTACCTGGGCTGCGTGCTGAACGCTGTCAATCTGACCTCCTACAGCG  
TGAGCAGCTGTGATCTGAGAATGGGATCCGGCTTCTGCATTGACTATGCACTGC  
CATCCAGCGGGGGAGCGGAAGCGGAATCAGTTCACCATACAGGTTCCGTGACTT  
TTGAGCCCTTCAACGTGAGCTTCGTGAACGACAGTGTGGAGACCGTCCGGCGGG  
CTGTTTGAATCCAGATTTCAACAAACTTCACTATTGCAGGCCACGAGGAGTTCA  
TCCAGACCAGCTCCCCAAAGTGACAATCGATTGTTACGCCTTCGTCTGCAGCAA  
TTATGCTGCATGTCATGATCTGCTGAGCGAGTACGGAACTTTTTTCGACAAATATC  
AACAGCATTCTGAACGAAGTGAATGATCTGCTGGACATTACCAGCTGCAGGTG  
GCTAACGCACTGATGCAGGGCGTCACTGAGCTCTAATCTGAACACTAATCTGC  
ACAGCGATGTGGACAATATCGACTTCAAGAGCCTGCTGGGATGTCTGGGGTCCC  
AGTGGCGATCAAGCTCCCGCTCCCTGCTGGAGGATCTGCTGTTCAACAAGGTGA  
AACTGTCTGACGTGGGCTTTGTGCGAGGCCTACAACAATTGTACCGGAGGCAGCG  
AAATCCGGGATCTGCTGTGCGTGCAGAGCTTCAATGGCATCAAAGTCTGCCTC  
CAATTCTGTCCGAAACTCAGATCAGCGGGTATACTACCGCAGCTACCGTGGCAG  
CAATGTTCCACCTTGGAGCGCCGAGCAGGAGTGCCCTTTTCCCTGAACGTCC  
AGTACCGCATCAATGGGCTGGGAGTGACCATGGACGTCTGAACAAGAATCAGA  
AACTGATTGCCAACGCTTTCAATAAGGCTCTGCTGAGCATCCAGAACGGGTTTAC  
CGCAACAAATTCTGCACTGGCCAAAATCCAGAGTGTGCTGAACGCTAATGCACA  
GGCCCTGAACAGCCTGCTGCAGCAGCTGTTAATAAGTTCGGAGCTATTTCTAGT  
TCACTGCAGGAGATCCTGTCTAGACTGGATCCCCCGAAGCACAGGTGCAGATC  
GACCGGCTGATTAACGGCAGACTGACCGCACTGAATGCCTACGTGTACAGCAG  
CTGAGCGATATCACCTGATCAAGGCTGGGGCAAGCCGAGCCATCGAGAAGGT  
GAACGAATGCGTGAAAAGTCAAGTCAACCCGGATTAATTTCTGCGGCAACGGGAA  
TCACATCCTGAGCCTGGTGCAGAACGCTCCTTATGGGCTGCTGTTTATCCATTT  
AGTTACAAGCCCACCAGCTTCAAGACTGTCTGGTGTACCTGGACTGTGCCTG  
AGCGGAGATCGGGGCATTGCCCCCAAGCAGGGGTATTTTCATCAAACAGAACGAC  
TCCTGGATGTTTACAGGAAGCTCCTACTATTACCCCGAGCCTATCTCTGACAAGA  
ATGTCGTGTTTATGAACAGCTGCTCCGTGAACCTTACCAAAGCCCCCTTCATCTA  
CCTGAACAATAGCATCCCAAACCTGTCCGATTTTCGAGGCTGAACCTGTCTGTGG  
TTTAAGAATCACACCAGTATTGCCCTAACCTGACATTCAATAGCCATATCAACGC  
TACATTTCTGGACCTGTATTACGAGATGAACGTTATCCAGGAATCTATTAAGAGTC  
TGAACAGCGGGCCGCTGGAGGTGCTGTTCCAGGGCCAGGCGGGTACATCCA

|             |                                                                                                                                                                                                                                                                                                                                                                                                                                                                                                                                                                                                                                                                                                                                                                                                                                                                                                                                                                                                                                                                                                                                                                                                                                                                                                                                                                                                                                                                                                                                                                                                                                                                                                                                                                                                                                                                                                                                                                                                                                                                                                                                                                                                                                                                                                                                                                                                                                                                                                                                                                                                                                                                                                                                                                                                                                                                                                                                                                                                                                                                                                                                                                                                   |
|-------------|---------------------------------------------------------------------------------------------------------------------------------------------------------------------------------------------------------------------------------------------------------------------------------------------------------------------------------------------------------------------------------------------------------------------------------------------------------------------------------------------------------------------------------------------------------------------------------------------------------------------------------------------------------------------------------------------------------------------------------------------------------------------------------------------------------------------------------------------------------------------------------------------------------------------------------------------------------------------------------------------------------------------------------------------------------------------------------------------------------------------------------------------------------------------------------------------------------------------------------------------------------------------------------------------------------------------------------------------------------------------------------------------------------------------------------------------------------------------------------------------------------------------------------------------------------------------------------------------------------------------------------------------------------------------------------------------------------------------------------------------------------------------------------------------------------------------------------------------------------------------------------------------------------------------------------------------------------------------------------------------------------------------------------------------------------------------------------------------------------------------------------------------------------------------------------------------------------------------------------------------------------------------------------------------------------------------------------------------------------------------------------------------------------------------------------------------------------------------------------------------------------------------------------------------------------------------------------------------------------------------------------------------------------------------------------------------------------------------------------------------------------------------------------------------------------------------------------------------------------------------------------------------------------------------------------------------------------------------------------------------------------------------------------------------------------------------------------------------------------------------------------------------------------------------------------------------------|
|             | GAGGCACCTCGAGACGGACAGGCTTATGTGAGAAAGGATGGAGAGTGGGTCTCT<br>GCTGTCCACCTTCTGGGCCACCACCACCACCACCACCACCATCATAGCGCCTGGTC<br>CCACCCCAAGTTCGAGAAGTGA                                                                                                                                                                                                                                                                                                                                                                                                                                                                                                                                                                                                                                                                                                                                                                                                                                                                                                                                                                                                                                                                                                                                                                                                                                                                                                                                                                                                                                                                                                                                                                                                                                                                                                                                                                                                                                                                                                                                                                                                                                                                                                                                                                                                                                                                                                                                                                                                                                                                                                                                                                                                                                                                                                                                                                                                                                                                                                                                                                                                                                                      |
| NL63 (S-2P) | ATGAAGCTGTTCCCTGATCCTGCTGGTGCTGCCCTGGCCAGCTGCTTCTTTACCT<br>GTAACCTAATGCCAACCTGAGCATGCTGCAGCTGGGCGTGCCCGACAATAGCT<br>CCACCATCGTGACAGGCCCTGCTGCCTACACACTGGTTCTGCGCCAACCAGAGCA<br>CCAGCGTGTACTCCGCCAATGGCTTCTTTTATATCGATGTGGGCAACCACAGATC<br>TGCCTTTGCCCTGCACACCGGCTACTATGACGCCAACCAGTACTATATCTACGTG<br>ACAAATGAGATCGGCCTGAACGCCTCCGTGACCCTGAAGATCTGCAAGTTCTCTA<br>GGAACACCACATTCGACTTTCTGAGCAATGCCTCTAGCTCCTTCGATTGTATCGT<br>GAATCTGCTGTTTACCGAGCAGCTGGGAGCACCCTGGGAATCACCATCTCCGG<br>CGAGACAGTGAGACTGCACCTGTACAACGTGACCCGGACCTTCTACGTGCCAGC<br>AGCCTATAAGCTGACAAAGCTGAGCGTGAAGTGCTACTTCAATTATTCCTGCGTG<br>TTCAGCGTGGTGAACGCCACCCTGACAGTGAATGTGACCACACACAACGGCCGC<br>GTGGTGAATTACACAGTGTGCGACGATTGTAACGGCTATACCGACAATATCTTCA<br>GCGTGCAGCAGGATGGCAGAATCCCCAATGGCTTCCCCTTTAACAATTGGTTTCT<br>GCTGACCAACGGCAGCACACTGGTGGATGGCGTGTCCAGACTGTATCAGCCCCT<br>GAGGCTGACCTGCCTGTGGCCTGTGCCAGGCCTGAAGCTAGCACCCGGCTTCG<br>TGTACTTTAATGCCACAGGCTCCGACGTGAATTGTAACGGCTACCAGCACAACCTC<br>TGTGGTGGATGTGATGCGCTATAATCTGAACTTCTCCGCCAATTCTCTGGACAAC<br>CTGAAGTCTGGCGTGATCGTGTTCAAGACCCTGCAGTACGATGTGCTGTTTTATT<br>GCAGCAACTCCTCTAGCGGCGTGCTGGACACCACAATCCCATTCCGGCCCCTCCT<br>CTCAGCCTTACTACTGTTTCATCAACTCTACCATCAACACCACACACGTGAGCAC<br>ATTCGTGGGCATCCTGCCACCTACCGTGCGCGAGATCGTGGTGGCAAGGACCG<br>GCCAGTTTTACATCAATGGCTTCAAGTATTTTGACCTGGGCTTCATCGAGGCCGT<br>GAACTTCAACGTGACCACAGCCTCCGCCACCGACTTCTGGACAGTGGCCTTCGC<br>CACATTTGTGGATGTGCTGGTGAACGTGTCCGCCACCAATATCCAGAACCTGCT<br>GTACTGCGATTCTCCTTTCGAGAAGCTGCAGTGTGAGCACCTGCAGTTTGGCCT<br>GCAGGACGGCTTCTACAGCGCCAACCTTCTGGACGATAATGTGCTGCCTGAGAC<br>ATATGTGGCCCTGCCAATCTACTATCAGCACACCGATATCAATTTACCCGCCACA<br>GCCAGCTTTGGCGGCTCCTGCTACGTGTGCAAGCCACACCAGGTGAACATCAGC<br>CTGAATGGCAACACCTCCGTGTGCGTGAGAACAAGCCACTTCTCCATCAGATACA<br>TCTATAACAGGGTGAAGAGCGGCTCCCCAGGCGACAGCTCCTGGCACATCTACC<br>TGAAGTCCGGCACCTGTCTTTCTCTTTTAGCAAGCTGAACAATTTCCAGAAGTTT<br>AAGACCATCTGCTTCTACAGTGGAGGTGCCAGGCAGCTGTAATTTTCCCCTGG<br>AGGCCACATGGCACTACACCAGCTATACAATCGTGGGCGCCCTGTACGTGACAT<br>GGTCTGAGGGCAACAGCATCACCGGCGTGCCCTATCCCGTGAGCGGCATCAGA<br>GAGTTCAGCAATCTGGTGTGAACAACGTGCACAAAGTACAACATCTACGATTACG<br>TGGGCACCGGCATCATCAGGTCTAGCAACCAGTCCCTGGCCGGCGGCATCACC<br>TACGTGTCCAATTCTGGCAACCTGCTGGGCTTCAAGAACGTGAGCACCGGCAAT<br>ATCTTTATCGTGACACCTTGAATCAGCCAGACCAGGTGGCCGTGTATCAGCAGA<br>GCATCATCGGCGCCATGACAGCCGTGAACGAGTCCAGATACGGCCTGCAGAAC<br>CTGCTGCAGCTGCCAAATTTCTACTACGTGAGCAACGGCGGCAACAATTGCACC<br>ACAGCCGTGATGACCTACTCCAACCTTTGGCATCTGTGCCGACGGCTCTCTGATC<br>CCTGTGAGGCCACGCAATTCCTCTGATAACGGCATCAGCGCCATCATCACAGCC<br>AATCTGTCTATCCCCAGCAACTGGACCACATCTGTGCAGGTGGAGTACCTGCAG<br>ATCACCAGCACACCTATCGTGGTGGATTGCGCCACCTACGTGTGCAATGGCAAC<br>CCAAGATGCAAGAATCTGCTGAAGCAGTACACCAGCGCCTGTAAGACAATCGAG<br>GACGCACTGAGGCTGTCCGCCACCTGGAGACAAACGACGTGAGCTCCATGCT<br>GACCTTCGATTCCAATGCCTTTTCTCTGGCCAACGTGACCTCCTTCGGCGATTAT<br>AATCTGTCTAGCGTGCTGCCACAGCGGAACATCAGATCCTCTAGGATCGCAGGC<br>AGGAGCGCCCTGGAGGACCTGCTGTTTTCCAAGGTGGTACCTCTGGCCTGGG<br>CACAGTGGACGTGGATTACAAGTCTGCACCAAGGGCCTGTCTATCGCCGATCT<br>GGCCTGTGCCAGTACTATAACGGCATCATGGTGTGCCAGGAGTGGCAGACG<br>CAGAGCGCATGGCCATGTATACCGGCAGCCTGATCGGAGGAATGGTGTGGGA<br>GGACTGACATCCGCCGAGCAATCCCTTTCTCTCTGGCCCTGCAGGCCCGGCTG |

|                    |                                                                                                                                                                                                                                                                                                                                                                                                                                                                                                                                                                                                                                                                                                                                                                                                                                                                                                                                                                                                                                                                                                                                                                                                                                                                                                                                                                                                                                                                                                                                                                                                                                                                                                                                                                                                                                                                                                                                                                                |
|--------------------|--------------------------------------------------------------------------------------------------------------------------------------------------------------------------------------------------------------------------------------------------------------------------------------------------------------------------------------------------------------------------------------------------------------------------------------------------------------------------------------------------------------------------------------------------------------------------------------------------------------------------------------------------------------------------------------------------------------------------------------------------------------------------------------------------------------------------------------------------------------------------------------------------------------------------------------------------------------------------------------------------------------------------------------------------------------------------------------------------------------------------------------------------------------------------------------------------------------------------------------------------------------------------------------------------------------------------------------------------------------------------------------------------------------------------------------------------------------------------------------------------------------------------------------------------------------------------------------------------------------------------------------------------------------------------------------------------------------------------------------------------------------------------------------------------------------------------------------------------------------------------------------------------------------------------------------------------------------------------------|
|                    | <p>AATTACGTGGCCCTGCAGACCGATGTGCTGCAGGAGAATCAGAAGATCCTGGCC<br/> GCCTCTTTCAACAAGGCCATCAACAATATCGTGGCCAGCTTTAGCTCCGTGAACG<br/> ATGCCATCACCCAGACAGCCGAGGCCATCCACACCGTGACAATCGCCCTGAATA<br/> AGATCCAGGACGTGGTGAACCAGCAGGGCAGCGCCCTGAATCACCTGACCTCC<br/> CAGCTGCGCCACAATTTCCAGGCCATCAGCAACTCCATCCAGGCCATCTACGAC<br/> AGGCTGGACCCCCACAGGCAGACCAGCAGGTGGATAGGCTGATCACCGGCCG<br/> GCTGGCCGCCCTGAACGCCTTCGTGAGCCAGGTGCTGAATAAGTATACAGAGGT<br/> GCGCGGCAGCCGGAGACTGGCACAGCAGAAGATCAACGAGTGCCTGAAGTCTC<br/> AGAGCAACCCGTACGGCTTCTGTGGCAATGGCACCCACATCTTTAGCATCGTGA<br/> ATTCCGCCCCAGACGGCCTGCTGTTCTGCACACCGTGCTGCTGCCACAGATT<br/> ATAAGAACGTGAAGGCCTGGAGCGGCATCTGCGTGGACGGCATCTACGGCTATG<br/> TGCTGCGCCAGCCTAACCTGGTGTGTACAGCGATAATGGCGTGTCCGCGTGA<br/> CCTCCCGGATCATGTTTCAGCCAGACTGCCTGTGCTGAGCGACTTCGTGCAGA<br/> TCTATAACTGTAACGTGACATTTGTGAACATCTCCAGGGTGGAGCTGCACACCGT<br/> GATCCCTGACTACGTGGATGTGAACAAGACACTGCAGGAGTTTGCCCAAGATCTG<br/> GCCCAGTACGTGAAGCCTAATTTGCACCTGACCCCTTCAACCTGACATATCTG<br/> AATCTGTCTAGCGAGCTGAAGCAGCTGGAGGCCAAGACCCGCTCCCTGTTCCAG<br/> ACCACAGTGGAGCTGCAGGGCCTGATCGACCAGATCAACTCTACATACGTGGAT<br/> CTGAAGCTGCTGAATCGGTTTGAGAACGGATCCGGATACATCCCGAGGCCCCC<br/> AGAGATGGCCAGGCCTACGTGCGGAAGGACGGCGAGTGGTACTGCTGAGCAC<br/> ATTCCTGGGCAGATCCCTGGAGGTGCTGTTCCAGGGCCCAGGCCATCACCACCA<br/> TCACCACCATCATAGCGCCTGGTCCCACCCCAAGTTGAGAAGGGCGGCGGTA<br/> GTGGAGGGGGCGGATCTGGCGGCTCAGCTTGGAGCCACCCCAAGTTGAAAAG<br/> TGA</p>                                                                                                                                                                                                                                                                                                                                                                                                                                                                                                                                               |
| <p>OC43 (S-2P)</p> | <p>ATGTTCTGATCCTGCTGATCAGCCTGCCTACCGCCTTTGCCGTGATCGGGCAG<br/> CTGAAGTGCCCACTGGATAGCCGGACAGGCTCCCTGAACAATATCGACACCGGC<br/> CCCCCTTCCATCTCTACCGCCACAGTGGATGTGACAAATGGCCTGGGCACCTAC<br/> TATGTGCTGGACAGGGTGTATCTGAATACCACACTGTTCTGAACGGCTACTATC<br/> CCACCAGCGGCTCCACATACCGCAACATGGCCCTGAAGGGCACAGATAAGCTGT<br/> CCACCCTGTGGTTAAGCCACCCTTCTGTCTGACTTTATCAATGGCATCTTCGC<br/> CAAGGTGAAGAACACCAAGGTGTTAAGGATGGCGTGATGATTCTGAGTTCCCC<br/> GCCATCACCATCGGCAGCACATTTGTGAACACCTTTACAGCGTGGTGGTGCAG<br/> CCTAGGACAATCAATTCTACCCAGGACGGCGTGAACAAGCTGCAGGGCCTGCTG<br/> GAGGTGAGCGTGTGCCAGTATAATATGTGCGAGTACCCCCACACAATCTGCCAC<br/> CCTAAGCTGGGCAACCACTTCAAGGAGCTGTGGCACATGGATACCGGCGTGGT<br/> TCTGTCTGTATAAGCGCAACTTACCTACGACGTGAACGCCACCTATCTGTACT<br/> TCCACTTTTACCAGGAGGGCGGCACATTCTATGCCTACTTTACCGATACAGGCGT<br/> GGTGACCAAGTTCTGTTCAACGTGTACCTGGGCATGGCCCTGAGCCACTACTA<br/> TGTGATGCCACTGACATGCATCTCCCGGAGAGATATCGGCTTACCCTGGAGTA<br/> TTGGGTGACCCCTGACATCCCGGCAGTACCTGCTGGCCTTCAATCAGGACGG<br/> CATCATCTTTAACGCCGTGGACTGCATGTCTGACTTCATGAGCGAGATCAAGTGT<br/> AAGACACAGAGCATCGCCCTCCAACCGCGTGTATGAGCTGAACGGCTACACC<br/> GTGCAGCCATCGCCGACGTGTACAGGCGCAAGCCAGATCTGCCAACTGCAAT<br/> ATCGAGGCCTGGCTGAATGACAAGTCCGTGCCCTCTCCTCTGAACTGGGAGAGA<br/> AAGACCTTCAGCAACTGTAACCTCAACATGAGCTCCCTGATGTCTTTCATCCAGG<br/> CCGACAGCTTTACATGCAACAATATCGATGCCGCCAAGATCTACGGCATGTGCTT<br/> CTTAGCATCACCATCGACAAGTTTGCCATCCCTAACGGCCGGAAGGTGGATCT<br/> GCAGCTGGGCAATCTGGGCTATCTGCAGTCTTTCAACTACAGAATCGATACCACA<br/> GCCACAAGCTGCCAGCTGTACTATAATCTGCCAGCCGCCAACGTGTCCGTGTCT<br/> CGTTCAATCCCTCCACCTGGAACAAGAGATTGGCTTTATCGAGAATAGCGTGT<br/> TCAAGCCACAGCCAGCAGGCGTGTGACAAACCACGACGTGGTGTACGCCAG<br/> CACTGTTTCAAGGCCCAAGAATTTTTGCCCTGTAAGCTGAACTCCTCTCTGT<br/> GCGTGGGCTCCGGACCAGGCAAGAACAATGGCATCGGCACCTGTCCCGCCGGC<br/> ACAACTATCTGACCTGCCACAACCTGTGCAACCCTGATCCAATCACCTTCACAG<br/> GCCCCTACAAGTGCCCTCAGACCAAGAGCCTGGTGGGAATCGGAGAGCACTGC<br/> TCCGGACTGGCCGTGAAGTCTGACTACTGTGCGGCAATCCTTGCACATGTCAG</p> |

|              |                                                                                                                                                                                                                                                                                                                                                                                                                                                                                                                                                                                                                                                                                                                                                                                                                                                                                                                                                                                                                                                                                                                                                                                                                                                                                                                                                                                                                                                                                                                                                                                                                                                                                                                                                                                                                                                                                                                                                                                                                                                                                                                                                                                                                                                                                                                                                                                                                                                                                                                                                                                                                                                                                                                          |
|--------------|--------------------------------------------------------------------------------------------------------------------------------------------------------------------------------------------------------------------------------------------------------------------------------------------------------------------------------------------------------------------------------------------------------------------------------------------------------------------------------------------------------------------------------------------------------------------------------------------------------------------------------------------------------------------------------------------------------------------------------------------------------------------------------------------------------------------------------------------------------------------------------------------------------------------------------------------------------------------------------------------------------------------------------------------------------------------------------------------------------------------------------------------------------------------------------------------------------------------------------------------------------------------------------------------------------------------------------------------------------------------------------------------------------------------------------------------------------------------------------------------------------------------------------------------------------------------------------------------------------------------------------------------------------------------------------------------------------------------------------------------------------------------------------------------------------------------------------------------------------------------------------------------------------------------------------------------------------------------------------------------------------------------------------------------------------------------------------------------------------------------------------------------------------------------------------------------------------------------------------------------------------------------------------------------------------------------------------------------------------------------------------------------------------------------------------------------------------------------------------------------------------------------------------------------------------------------------------------------------------------------------------------------------------------------------------------------------------------------------|
|              | <p>CCACAGGCCTTCCTGGGATGGAGCGCCGACTCCTGCCTGCAGGGCGATAAGTG<br/> TAATATCTTTGCCAACCTGATCCTGCACGATGTGAACTCTGGCCTGACCTGCAGC<br/> ACAGACCTGCAGAAGGCCAATACCGATATCAAGCTGGGCGTGTGCGTGAACAT<br/> GACCTGTATGGCATCTCCGGCCAGGGCATCTTCGTGGAAGTGAATGCCACATAC<br/> TATAATTCCTGGCAGAACCTGCTGTACGACTCTAATGGCAACCTGTATGGCTTCA<br/> GGGATTACATACCAATCGGACCTTCATGATCAGATCTTGCTATAGCGGACGCGT<br/> GAGCGCCGCATTCCACGCAAACAGCTCCGAGCCTGCCCTGCTGTTGAGGAATAT<br/> CAAGTGCAACTACGTGTTTAAACAATTCCCTGATCCGCCAGCTGCAGCCAATCAAC<br/> TATTTTGATTCTTACCTGGGCTGCGTGGTGAATGCCTACAACAGCACCCGCCATCT<br/> CTGTGCAGACATGCGACCTGACCGTGGGCTCCGGCTATTGCGTGGATTACTCCA<br/> AGAATCGGAGATCTAGGCGCGCCATCACACAGGCTACAGTTTCAAAACTTTG<br/> AGCCTTTCACCGTGAATAGCGTGAACGACTCCCTGGAGCCTGTGGGCGGCCTGT<br/> ATGAGATCCAGATCCCAAGCGAGTTCACCATCGGCAACATGGAGGAGTTTATCC<br/> AGACATCTAGCCCAAAGGTGACCATCGACTGCGCAGCCTTCGTGTGCGGCGATT<br/> ATGCGCCTGCAAGTCTCAGCTGGTGGAGTACGGCAGCTTTTGTGATAATATCAA<br/> GCCATCCTGACCGAAGTGAATGAGCTGCTGGACACCACACAGCTGCAGGTGG<br/> CCAATAGCCTGATGAACGGCGTGACCCTGTCCACAAAGCTGAAGGACGGCGTGA<br/> ATTTCAACGTGGACGATATCAACTTTTCTCTGTGCTGGGCTGCCTGGGCTCCGA<br/> GTGTTCTAAGGCAAGCTCCCGGAGCGCCATCGAGGACCTGCTGTTGATAAGGT<br/> GAAGCTGTCCGATGTGGGCTTTGTGGCCGCCTATAACAATTGCACCGGCGGCGC<br/> CGAGATCAGAGACCTGATCTGCGTGCAGAGCTACAAGGGCATCAAGGTGCTGCC<br/> CCCTCTGCTGAGCGAGAACCAGATCTCCGGCTATACACTGGCAGCCACCAGCGC<br/> CTCCCTGTTCCACCATGGACAGCAGCAGCAGGCGTGCCCTTTTATCTGAATGT<br/> GCAGTACCGCATCAACGGCCTGGGCGTGACCATGGACGTGCTGTCCCAGAATCA<br/> GAAGCTGATCGCCAACGCCTTCAACAATGCCCTGGACGCCATCCAGGAGGGCTT<br/> TGATGCCACCAATAGCGCCCTGGTGAAGATCCAGGCCGTGGTGAATGCCAACGC<br/> CGAGGCCCTGAACAATCTGCTGCAGCAGCTGTCCAACCGGTTCCGGCGCCATCTC<br/> TAGCTCCCTGCAGGAGATCCTGTCTAGACTGGACCCTCCAGAGGCCGAGGCCCA<br/> GATCGATAGGCTGATCAATGGCCGCCTGACAGCCCTGAACGCCTACGTGAGCCA<br/> GCAGCTGTCTGATAGCACCTGGTGAAGTTCCTCCGCCGCCAGGCCATGGAGAA<br/> AGTGAATGAGTGCCTGAAGTCTCAGTCTAGCCGGATCAACTTTTGTGGCAATGG<br/> CAACCACATCATCAGCCTGGTGCAGAACGCCCCATATGGCCTGTACTTTATCCAC<br/> TTCTCTTATGTGCCACAAAGTACGTGACCGCCAAGGTGAGCCCTGGACTGTGC<br/> ATCGCAGGCGACAGAGGAATCGCACCAAGAGCGGCTATTTTCGTGAATGTGAAC<br/> AATACATGGATGTACACCGGCTCCGGCTACTATTACCCCGAGCCTATCACCGAG<br/> AACAAATGTGGTGGTCATGTCCACATGTGCCGTGAACTATACCAAGGCCCCCTAC<br/> GTGATGCTGAATACCTCTACACCTAACCTGCCAGACTTCAGGGAGGAGCTGGAT<br/> CAGTGGTTAAGAATCAGACAAGCGTGGCCCTGACCTGTCCCTGGATTACATCA<br/> ACGTGACCTTTCTGGACCTGCAGGTGGAGATGAATCGCCTGCAGGAGGCCATCA<br/> AGGTGCTGAACGGATCCGGATACATCCCCGAGGCCCCAGAGATGGCCAGGCC<br/> TACGTGCGGAAGGACGGCGAGTGGTACTGCTGAGCACATTCTGGGCGATC<br/> CCTGGAGGTGCTGTTCCAGGGCCAGGCCATCACACCATCACACCATCATAG<br/> CGCCTGGTCCCACCCCAAGTTCGAGAAGGGCGGCGGTAGTGGAGGGGGCGGA<br/> TCTGGCGGCTCAGCTTGGAGCCACCCCAAGTTCGAAAAGTGA</p> |
| WIV-1 (S-2P) | <p>ATGAAACTGCTGGTGTGCTGGTCTTTGCCCACTGGTCTCATCCTACACTATTGAAA<br/> AATGCCTGGACTTTGACGACAGAACTCCCCCGCCAACACCCAGTTTCTGAGCT<br/> CCCACCGGGGCGTGTACTATCCAGACGATATCTTCAGATCCAACGTGCTGCACC<br/> TGGTGCAGGATCACTTCCTGCCCTTTGACTCTAATGTGACAAGATTCATCACCTTT<br/> GGCCTGAATTTGACAACCCTATCATCCCATTCAAGGATGGCATCTACTTTGCCG<br/> CCACAGAGAAGTCTAACGTGATCCGGGGCTGGGTGTTTGGCAGCACCATGAACA<br/> ATAAGTCTCAGAGCGTATCATCATGAACAATAGCACCAACCTGGTTCATCAGAGC<br/> CTGCAATTTGAGCTGTGCGACAACCCTTCTTTGTGGTGTGAAGTCCAACAAT<br/> ACACAGATCCCTTCTTATATCTTTAACAATGCCTTCAACTGCACCTTTGAGTACGT<br/> GAGCAAAGACTTCAACCTGGACCTGGGCGAGAAGCCAGGCAACTTCAAGGACCT<br/> GCGGGAGTTCGTGTTTAGAAACAAGGATGGCTTCCTGCACGTGTATTCCGGCTA<br/> CCAGCCAATCTCCGCCGCATCTGGCCTGCCAACAGGCTTCAATGCCCTGAAGCC</p>                                                                                                                                                                                                                                                                                                                                                                                                                                                                                                                                                                                                                                                                                                                                                                                                                                                                                                                                                                                                                                                                                                                                                                                                                                                                                                                                                                                                                                                                                                                                                                                                                                                                                                                                                                                                                                                                                                                                                                    |

CATCTTTAAGCTGCCTCTGGGCATCAATATCACCAACTTCAGGACACTGCTGACC  
GCATTTCCACCTCGCCCCGACTATTGGGGCACAAGCGCCGCAGCCTATTTCTGTG  
GGCTACCTGAAGCCTACCACCTTCATGCTGAAGTACGATGAGAACGGCACAATC  
ACCGACGCCGTGGATTGCTCCCAGAATCCTCTGGCCGAGCTGAAGTGTAGCGTG  
AAGTCCTTTGAGATCGACAAGGGCATCTATCAGACCAGCAACTTTTCGGGTGGCC  
CCATCCAAGGAGGTGGTGAGATTCCCTAATATCACAAACCTGTGCCATTTCGGC  
GAGGTGTTAATGCCACCACATTCCCCAGCGTGTACGCCTGGGAGCGGAAGAGA  
ATCTCTAACTGCGTGGCCGATTATAGCGTGTGTACAATTCCACATCTTTTCAGCA  
CCTTTAAGTGCTATGGCGTGTCCGCCACCAAGCTGAATGACCTGTGCTTCTCTAA  
CGTGTACGCCGATAGCTTTGTGGTGAAGGGCGACGATGTGAGGCAGATCGCAC  
CTGGACAGACCGGCGTGTATCGCAGACTACAATAAGCTGCCAGACGATTTCA  
CAGGCTGCGTGTGGCCTGGAATACCCGCAACATCGATGCCACACAGACCGGC  
AACTACAATTATAAGTACAGGAGCCTGAGGCACGGCAAGCTGAGGCCTTTTCGAG  
CGCGACATCTCCAACGTGCCCTTTTCTCCTGATGGCAAGCCTTGCACCCACCC  
GCCTTTAATTGTTACTGGCCACTGAACGACTATGGCTTCTACATCACAAATGGCA  
TCGGCTATCAGCCATACAGGGTGGTGGTGTGAGCTTTCGAGCTGCTGAACGCAC  
CAGCAACAGTGTGCGGACCAAGCTGTCCACCGATCTGATCAAGAATCAGTGCG  
TGAACCTCAACTTCAACGGCCTGACAGGCACCGGCGTGTGACCCCTCTAGCA  
AGAGGTTCCAGCCTTTTCAGCAGTTCGGCCGCGACGTGAGCGATTTTCAGACT  
CCGTGCGCGACCCTAAGACCTCCGAGATCCTGGATATCTCTCCATGCAGCTTTG  
GCGGCGTGTCTGTGATCACCCCGGCACAAACACCTCCTCTGAGGTGGCCGTG  
CTGTACCAGGATGTGAATTGTACAGACGTGCCAGTGGCAATCCACGCAGACCAG  
CTGACCCCTTCTTGGCGGGTGCACAGCACAGGCAACAACGTGTTCCAGACCCAG  
GCAGGATGCCTGATCGGAGCAGAGCACGTGGATAACCAGCTATGAGTGCGACATC  
CCTATCGGCGCCGGCATCTGTGCCTCCTACCACACAGTGAGCTCCCTGAGATCC  
ACCTCTCAGAAGTCCATCGTGGCCTATACCATGTCTCTGGGCGCCGATTCTAGCA  
TCGCCTACAGCAACAATAACAATCGCCATCCCAACCAACTTTAGCATCTCCATCAC  
CACAGAAGTGATGCCCGTGTCCATGGCCAAGACATCTGTGGACTGCAACATGTA  
TATCTGTGGCGATTCCACCGAGTGCGCCAATCTGCTGCTGCAGTACGGCTCCTT  
CTGTACACAGCTGAACAGGGCCCTGTCTGGAATCGCAGTGGAGCAGGACCGGA  
ATACCAGAGAGGTGTTCCGCCAGGTGAAGCAGATGTACAAGACACCTACCCTGA  
AGGACTTTGGCGGCTTCAACTTTTCTCAGATCCTGCCAGATCCCCTGAAGCCAAC  
AAAGCGGAGCTTCATCGAGGACCTGCTGTTAATAAGGTGACCCTGGCCGATGC  
CGGCTTCATGAAGCAGTATGGCGAGTGCCTGGGCGATATCAACGCCCGGGACC  
TGATCTGTGCCAGAAGTTAATGGCCTGACAGTGTGCCTCCACTGCTGACCG  
ACGATATGATCGCAGCATAACAGCCGCCCTGGTGAAGCGGCACAGCAACCGCA  
GGATGGACCTTTGGCGCAGGAGCCGCCCTGCAGATCCCCTTCGCCATGCAGAT  
GGCCTATCGTTTTAACGGCATCGGCGTGACCCAGAATGTGCTGTACGAGAACCA  
GAAGCAGATCGCCAATCAGTTCAACAAGGCCATCAGCCAGATCCAGGATCCCT  
GACCACAACCTCTACCCGCTGGGCAAGCTGCAGGACGTGGTGAATCAGAACG  
CCAGGCCCTGAATACACTGGTGAAGCAGCTGTCTCTAACTTCGGCGCCATCA  
GCTCCGTGCTGAATGATATCCTGTCCAGACTGGACCCCTGAGGCAGAGGTGC  
AGATCGATAGGCTGATCACCGGCCGCTGCAGTCTCTGCAGACATATGTGACCC  
AGCAGCTGATCAGGGCAGCAGAGATCAGAGCAAGCGCCAACCTGGCCGCCACA  
AAGATGAGCGAGTGCCTGCTGGGCCAGTCCAAGAGGGTGGACTTCTGTGGCAA  
GGGCTATCACCTGATGTCCTTTCTCAGGCAGCACCACACGGAGTGGTGTTCCT  
GCACGTGACCTACGTGCCATCTCAGGAGCGCAACTTTACAACCGCACCAGCAAT  
CTGCCACGAGGGCAAGGCCTACTTCCCAGGGAGGGCGTGTTCGTGTTAACG  
GCACAAGCTGGTTTATCACCCAGCGCAATTTCTTTTCCCCTCAGATCATCAAC  
CGACAATACATTTCGTGTCTGGCAGCTGTGACGTGGTTCATCGGCATCATCAACA  
ACCGTGTATGATCCACTGCAGCCGAGCTGGACTCTTTCAAGGAGGAGCTGGAT  
AAGTACTTTAAGAACCACACCAGCCCCGACGTGGATCTGGGCGACATCAGCGGC  
ATCAATGCCTCCGTGGTGAACATCCAGAAGGAGATCGATCGCCTGAATGAGGTG  
GCTAAGAACCCTGAATGAGTCTCTGATTGACCTGCAGGAACCTGGGCAAGTATGAA  
CAGGGATCCGGATACATCCCCGAGGCCCCAGAGATGGCCAGGCCTACGTGCG  
GAAGGACGGCGAGTGGTACTGCTGAGCACATTCTGGGCAGATCCCTGGAGG

|                |                                                                                                                                                                                                                                                                                                                                                                                                                                                                                                                                                                                                                                                                                                                                                                                                                                                                                                   |
|----------------|---------------------------------------------------------------------------------------------------------------------------------------------------------------------------------------------------------------------------------------------------------------------------------------------------------------------------------------------------------------------------------------------------------------------------------------------------------------------------------------------------------------------------------------------------------------------------------------------------------------------------------------------------------------------------------------------------------------------------------------------------------------------------------------------------------------------------------------------------------------------------------------------------|
|                | TGCTGTTCCAGGGCCCAGGCCATCACCACCATCACCACCATCATAGCGCCTGGT<br>CCCACCCCCAGTTCGAGAAGGGCGGCGGTAGTGGAGGGGGCGGATCTGGCGG<br>CTCAGCTTGGAGCCACCCCCAGTTCGAAAAGTGA                                                                                                                                                                                                                                                                                                                                                                                                                                                                                                                                                                                                                                                                                                                                              |
| Fc $\alpha$ R  | GAATTCGCCACCATGGACCCCAAGCAGACCACCCTGCTGTGCCTGGTGTGTGT<br>CTGGGCCAGAGAATCCAGGCCAGGAAGGCGACTTCCCCATGCCCTTCATCAGC<br>GCCAAGAGCAGCCCCGTGATCCCCCTGGATGGCAGCGTGAAGATCCAGTGCCA<br>GGCCATCAGAGAGGCCCTACCTGACCCAGCTGATGATCATTAAAGAACAGCACCTA<br>CCGCGAGATCGGCAGACGGCTGAAGTTCTGGAACGAGACAGACCCCGAGTTCG<br>TGATCGACCACATGGACGCCAACAAGGCCGGCAGATACCAGTGTGAGTACCGGA<br>TCGGCCACTACCGGTTCCGGTACAGCGACACCCTGGAAGTGGTCGTGACCGGC<br>CTGTACGGCAAGCCTTTCCTGAGCGCCGATCGGGGACTGGTGTGATGCCCGG<br>CGAGAACATCAGCCTGACCTGTAGCAGCGCCACATCCCCTTCGACAGATTAG<br>CCTGGCCAAAGAGGGCGAGCTGAGCCTGCCTCAGCATCAGTCTGGCGAGCACC<br>CCGCCAACTTTAGCCTGGGCCCTGTGGACCTGAACGTGTCCGGCATCTACCGGT<br>GCTACGGCTGGTACAACCGGTCCCCCTACCTGTGGTCCTTCCCCAGCAACGCTC<br>TGGAAGTGGTCGTGACAGACAGCATCCACCAGGACTACACCACCCAGAATGGCG<br>GCGGAGGATCTGGCGGAGGCGGAAGTGGCGGAGGGGGCTCTGGACTGAACGA<br>CATCTTCGAGGCCAGAAAATCGAGTGGCACGAGCACCACCACCATCACCCTG<br>ACTCGAG |
| Fusion peptide | LCBiot-SKPSKRSFIEDLLFNKVTLADAGFIKQYGD                                                                                                                                                                                                                                                                                                                                                                                                                                                                                                                                                                                                                                                                                                                                                                                                                                                             |

**Supplementary Table 3.** Sample Dilutions in the Fc Array Assay

| <b>Sample Type</b> | <b>Dilution</b> | <b>Detection Reagent</b>                                                                                                                                                  |
|--------------------|-----------------|---------------------------------------------------------------------------------------------------------------------------------------------------------------------------|
| Serum              | 1:5000          | anti-human IgG,<br>Fc $\gamma$ R2A, Fc $\gamma$ R2B,<br>Fc $\gamma$ R3A, Fc $\gamma$ R3B                                                                                  |
| Serum              | 1:1000          | anti-human IgG1                                                                                                                                                           |
| Serum              | 1:250           | anti-human IgA,<br>anti-human IgA1,<br>anti-human IgA2,<br>anti-human IgD,<br>anti-human IgM,<br>anti-human IgG2<br>anti-human IgG3,<br>anti-human IgG4,<br>Fc $\alpha$ R |
| Nasal              | 1:10            | All detections                                                                                                                                                            |
| Stool              | 1:10            | All detections                                                                                                                                                            |
